# Microbiota-independent antiviral protection conferred by aminoglycoside antibiotics

Smita Gopinath<sup>1,2</sup>, Myoungjoo V. Kim<sup>2</sup>, Tasfia Rakib<sup>2</sup>, Patrick W. Wong<sup>2</sup>, Michael van Zandt<sup>3</sup>, Natasha A. Barry<sup>4</sup>, Tsuneyasu Kaisho<sup>5</sup>, Andrew L. Goodman<sup>1,4</sup>, and Akiko Iwasaki<sup>1,2\*</sup>

<sup>1</sup>Howard Hughes Medical Institute (New Haven, CT, (USA)); <sup>2</sup>Department of Immunobiology, Yale University, (New Haven, CT, (USA)); <sup>3</sup>New England Discovery Partners (Branford, CT, (USA)); <sup>4</sup>Department of Microbial Pathogenesis and Microbial Sciences Institute, Yale University (New Haven, CT, (USA)); <sup>5</sup> Department of Immunology, Institute of Advanced Medicine, Wakayama Medical University, Kimiidera 811-1 (Wakayama 641-8509 (Japan)).

\* To whom correspondence should be addressed:

Akiko Iwasaki, Ph.D.

Department of Immunobiology

Yale University School of Medicine

300 Cedar Street, New Haven, CT 06520

Phone: (203) 785-2919

FAX: (203) 785-4972

Email: [akiko.iwasaki@yale.edu](mailto:akiko.iwasaki@yale.edu)

**Running Title:** Antiviral activity of aminoglycosides

**Keywords:** aminoglycosides, pattern recognition receptors, antiviral, interferon, herpes simplex virus, influenza virus, mucosal immunity.

## 26 **Abstract**

27 Antibiotics are widely used to treat infections in humans. However, the impact of antibiotic  
 28 use on host cells is understudied. We have identified a novel antiviral effect of commonly  
 29 used aminoglycoside antibiotics. We show that mucosal application of aminoglycosides  
 30 increased host resistance to a broad range of viral infections including herpes simplex  
 31 viruses, influenza A virus and Zika virus. Aminoglycoside treatment also reduced viral  
 32 replication in primary human cells. This antiviral activity was independent of the microbiota  
 33 as aminoglycoside treatment protected germ-free mice. Microarray analysis uncovered a  
 34 marked upregulation of transcripts for interferon-stimulated genes (ISGs) following  
 35 aminoglycoside application. ISG induction was mediated by TLR3, and required TIR-  
 36 domain-containing adapter-inducing interferon- $\beta$  (TRIF), signaling adaptor, and interferon  
 37 regulatory factors 3 (IRF3) and IRF7, transcription factors that promote ISG expression.  
 38 XCR1+ dendritic cells, which uniquely express TLR3, were recruited to the vaginal mucosa  
 39 upon aminoglycoside treatment and were required for ISG induction. These results  
 40 highlight an unexpected ability of aminoglycoside antibiotics to confer broad antiviral  
 41 resistance *in vivo*.

42

## 43 **Introduction**

44 Antibiotics comprise a large and complex group of compounds typically secreted by  
 45 bacteria targeting other prokaryotes. Antibiotics have revolutionized medicine since its  
 46 discovery. However, overuse and misuse of antibiotics have led to the emergence of  
 47 resistant bacteria in humans and in livestock. Current medicine faces a dire threat of  
 48 antibiotic resistant bacteria, which is rampant in many hospitals around the world. In  
 49 addition to its microbicidal activities, antibiotics can also directly affect mammalian cells in  
 50 a variety of ways. Antibiotics have been reported to directly inhibit eukaryotic translation <sup>1</sup>,  
 51 inhibit mitochondrial function <sup>2,3</sup> and induce changes in mammalian metabolic pathways <sup>4</sup>.  
 52 There is a critical need to better understand the host effects of commonly used antibiotics.

53

54 Here, we found that topical delivery of an aminoglycoside antibiotic to the mucosa induced  
 55 significant alteration of host gene expression, inducing increased expression of antiviral  
 56 interferon-stimulated genes (ISGs). Aminoglycoside-mediated ISG induction resulted in  
 57 significant protection against genital HSV-2 infection and significantly reduced Zika virus  
 58 replication. Aminoglycoside-mediated antiviral protection was independent of the host  
 59 microbiota, as intravaginal aminoglycoside treatment protected germ-free mice from HSV-  
 60 2 infection. This protection mechanism operates in the vaginal mucosa and nasal mucosa,  
 61 as intranasal aminoglycoside treatment increased ISG expression in the lung and  
 62 aminoglycoside pre-treated hosts had increased survival after highly virulent influenza A  
 63 virus infection. ISG expression was dependent on TLR3 and downstream signaling  
 64 pathway, and robust recruitment of TLR3-expressing XCR1+ dendritic cells to the vaginal  
 65 mucosa. Our results reveal an unexpected induction of antiviral state by commonly used  
 66 aminoglycoside antibiotics.

## 67 **Results**

### 68 **Prophylactic and post exposure application of vaginal antibiotics increase host** 69 **resistance to genital HSV infection in a microbiota-independent manner**

70 To investigate the effect of local, vaginal, antibiotic treatment on genital herpes virus  
71 infection, we treated mice daily with an antibiotic cocktail (composed of 0.5mg each of  
72 ampicillin, neomycin and vancomycin and 0.012mg metronidazole) administered  
73 intravaginally. All mice were first injected with Depo-provera to synchronize estrus cycles  
74 and increase HSV-2 infectivity<sup>5</sup>. After a week of daily antibiotic treatment, mice were  
75 infected intravaginally with HSV-2. After genital infection, HSV-2 undergoes multiple  
76 rounds of local replication in the vaginal mucosa which can be quantified by plaque assays  
77 for infectious virus in the vaginal wash <sup>6,7</sup>. In mice, by four days post infection, the virus  
78 travels to the dorsal root ganglion where it can spread to fresh epithelial sites resulting in  
79 disease symptoms including hair loss and hind limb paralysis which can be quantified  
80 using a clinical scoring system<sup>8</sup>. Antibiotic-treated mice had significantly decreased vaginal  
81 viral titers and displayed fewer clinical symptoms of genital herpes infection indicating  
82 suppression of both early and late stages of HSV-2 infection (Fig. 1a,b). One day after  
83 infection, mice pre-treated with antibiotics had five fold lower viral titers in the vaginal  
84 mucosa with three out of the five antibiotic-pretreated mice having no detectable virus. By  
85 day 2, this difference increased to 500 fold indicating active suppression of viral replication  
86 in the mucosal epithelium (Fig. 1b). Vaginal viral titers of antibiotic-pre-treated mice  
87 eventually reached similar levels as those of control mice by days 3-6 post infection  
88 (Supplementary Fig. 1a-b). However, viral spread to the dorsal root ganglia (DRG) was  
89 significantly suppressed (Supplementary Fig. 1d). Neural spread of HSV-2 is required for  
90 disease as herpes viruses unable to replicate in neurons are unable to cause neurological  
91 symptoms and morbidity <sup>9</sup>. In keeping with the reduced viral titers in the DRG, antibiotic



pre-treated mice displayed little to no disease pathology as compared to control mice (Fig. 1a).

To determine which of the antibiotics in the cocktail are required for protection against HSV infection, we treated mice singly with each antibiotic and compared disease progression to mice that had received the full antibiotic cocktail. We excluded metronidazole as it was present in very low quantities in the cocktail. Of the four antibiotics tested, neomycin alone recapitulated the host protection observed with the full antibiotic cocktail (Fig. 1c). Neomycin-treated mice had significantly lower vaginal viral titers as compared to other single antibiotic-treated mice and were identical to those treated with the full antibiotic cocktail (Fig. 1d). Thus, neomycin is the antiviral ingredient in the antibiotic cocktail.

Antibiotic-mediated effects on host immunity are often attributed to reduction or dysbiosis of relevant commensal bacterial communities. To determine if neomycin-mediated antiviral effect occurs via an impact on commensal vaginal flora, we treated germ-free mice intravaginally with neomycin. Notably, neomycin treatment of germ-free hosts also resulted in significant protection against genital HSV-2 infection. Neomycin-treated germ-free mice displayed no viral disease pathology (Fig. 1e) and had no detectable replicating virus in the vaginal mucosa (Fig. 1f) indicating that neomycin-mediated antiviral effect is independent of live or dead vaginal commensals, or microbiota in general. To determine if neomycin treatment had a therapeutic effect, HSV-2 infected mice were treated with neomycin at 4 hours post infection. Application of neomycin at later time points resulted in variable to no protection (data not shown). Neomycin treatment after infection resulted in lower viral titers (Fig. 1g) and highly reduced disease outcomes (Fig. 1h). These data indicated that vaginal application of neomycin before or shortly after exposure reduces HSV-2 infection and disease in a manner independent of commensal bacteria.

## **Vaginal neomycin treatment induces expression of interferon-stimulated genes**

To elucidate the mechanisms underlying neomycin-mediated host resistance against HSV-2, we analyzed vaginal gene transcription in neomycin-treated mice prior to infection. We identified over a hundred significantly upregulated genes (Fig. 2a; Supplementary Table 1). No genes were significantly downregulated in expression. Using Ingenuity pathway analysis, we found that genes in the type I interferon (IFN) pathway were heavily enriched (Fig. 2b), with over 30% of the upregulated genes falling within this pathway. We independently confirmed the upregulation of a subset of IFN-stimulated-genes (ISGs) using RT-qPCR (Fig. 2c). ISG expression was also increased in germ-free mice upon neomycin treatment (Supplementary Fig. 2). Neomycin-induced ISG expression was rapid, as a single treatment was sufficient to significantly increase ISG expression 2-5 fold though not to the levels observed after a week's treatment (8-10 fold) (Supplementary Fig. 3a). Neomycin-mediated ISG induction was also dose-dependent as increased amounts of neomycin correspondingly increased ISG expression (Supplementary Fig. 3a). Significant ISG induction was maintained up to 3 days after neomycin treatment and was only partially lost by 1 week post neomycin treatment with 5 of 8 genes still significantly upregulated (Supplementary Fig. 3c). Finally, this neomycin-mediated ISG induction was restricted to the site of application, as we observed no upregulation of ISG expression in the lungs of neomycin-treated mice (Supplementary Fig. 3d).

## **Most, but not all, aminoglycosides induce ISG expression.**

Neomycin is a member of a large and diverse group of aminoglycosides, many of which are commonly used to treat bacterial infection. To determine if ISG induction was common across the aminoglycoside family, we treated mice with a panel of structurally diverse aminoglycosides for 1-2 days. Five out of the seven aminoglycosides we tested significantly increased ISG expression upon application to the vaginal mucosa (Fig. 2d).

144 The two non-inducers were streptomycin, which contains a streptamine core distinct from  
 145 the other 2-deoxystreptamine-containing aminoglycosides, and amikacin, a kanamycin  
 146 homolog that contains an additional L-haba side chain <sup>10</sup>. Thus, the majority of the  
 147 aminoglycosides tested induce ISG expression upon application to the vaginal mucosa.  
 148 Since aminoglycosides mediate their antibiotic activity by binding ribosomal RNA, we  
 149 tested if this ISG-induction was observed in other non-aminoglycoside ribosomal-targeting  
 150 antibiotics <sup>11</sup>. Mice were treated intravaginally with tetracycline or chloramphenicol,  
 151 compounds that inhibit bacterial protein synthesis by binding the 50s ribosome subunit <sup>11</sup>  
 152 (Supplementary Fig. 4a,b). Compared to neomycin, neither compounds induced high  
 153 levels of ISGs, suggesting that ISG induction is not a common property of antibiotics that  
 154 target the ribosome. Previous studies have reported increased mitochondrial dysfunction  
 155 and a loss of mitochondria in mammalian cells <sup>2,12</sup> upon treatment with multiple classes of  
 156 antibiotics. We observed no reduction in total mitochondrial DNA in neomycin-treated  
 157 vaginal tissues (Supplementary Fig. 4c).

158 To determine the link between ISG expression and antiviral protection, we compared the  
 159 ability of ISG-inducing and non-ISG inducing aminoglycosides to protect mice against  
 160 HSV-2 infection. We selected two ISG-inducing aminoglycosides (kasugamycin, sisomicin)  
 161 as well as the two non-ISG inducing aminoglycosides (amikacin, streptomycin). Mice pre-  
 162 treated with non-ISG inducers were not protected against HSV-2 infection, with vaginal  
 163 viral titers and disease scores equivalent to those of PBS-treated control mice (Fig. 2e,f).  
 164 Kasugamycin and sisomicin treatment however, resulted in significant reduction in vaginal  
 165 viral titers and disease scores, displaying equivalent levels of antiviral protection as  
 166 compared to neomycin (Fig. 2e,f). These data indicated that ISG induction by  
 167 aminoglycosides corresponds to their ability to protect mice against viral challenge.

168 **Aminoglycosides induce antiviral protection against RNA and DNA viruses across**  
 169 **multiple mucosal surfaces.**

170 Next, we examined if aminoglycoside-mediated induction of antiviral immunity was specific  
 171 to the vaginal tract or if similar protection could be observed in other mucosal surfaces  
 172 such as the respiratory tract. A single intranasal dose of neomycin sufficed to significantly  
 173 upregulate ISG expression in the lung (Fig. 3a). To determine if this ISG induction results  
 174 in host antiviral resistance, we tested neomycin-mediated protection in a functionally  
 175 relevant mouse model of influenza infection. Many inbred mouse strains, including  
 176 C57BL/6, lack Mx1 (Ref. <sup>13</sup>). *Mx1* encodes the myxovirus resistance protein 1, a dynamin-  
 177 like GTPase that blocks primary transcription of influenza by binding to viral nucleoproteins  
 178 <sup>14-17</sup>. Mx1 is an ISG that is induced by neomycin treatment (Fig. 3a), and when expressed,  
 179 confers resistance to influenza A virus in mice <sup>14</sup>. In mice lacking Mx1 such as C57BL/6  
 180 strains, innate resistance to influenza is abrogated, and they rely on adaptive immunity.  
 181 We previously showed that oral neomycin treatment renders Mx1 deficient mice  
 182 susceptible to influenza disease because it depletes gut commensal bacteria that normally  
 183 support the function of dendritic cells that prime CD8 T cells <sup>18</sup>. In contrast, in this study,  
 184 we used Mx1 congenic mice, which are highly resistant to influenza virus. The use of Mx1  
 185 congenic mice allowed us to study the ability of intranasal neomycin to elicit innate antiviral  
 186 resistance, through inducing expression of ISGs including *Mx1*. To determine if neomycin-  
 187 mediated ISG induction was sufficient to confer protection, we infected neomycin-  
 188 pretreated Mx1 congenic mice with a highly virulent influenza A virus A/PR8 (hvPR8),  
 189 which was selected for its ability to replicate rapidly even in the presence of Mx1 (Ref.<sup>19</sup>). A  
 190 single dose of neomycin was sufficient to significantly increase survival following challenge  
 191 with an otherwise lethal dose of hvPR8, with 50% of mice protected (Fig. 3b). These  
 192 results demonstrate that mucosal application of a single dose of neomycin can result in  
 193 substantial protection against a highly virulent influenza A virus infection.  
 194 We also tested the ability of aminoglycosides to protect against another RNA virus  
 195 infection – Zika virus (ZIKV). ZIKV replicates in the vagina of wild-type mice and is

controlled by IRF3 and IRF7-dependent type I IFN secretion and IFNAR signaling<sup>20</sup>. Given the ability of aminoglycosides to induce ISGs, we examined if aminoglycoside-treated hosts are protected against ZIKV infection. We found that kasugamycin and neomycin treatment resulted in significantly lower levels of ZIKV RNA in the vaginal mucosa early in infection (Fig. 3c). Notably, while vaginal ZIKV titers in neomycin-treated mice eventually reached levels observed in PBS-treated controls, ZIKV replication in kasugamycin-treated mice remained significantly lower in a large proportion of mice in this group (Fig. 3c). To extend our findings to human cells, we treated primary peripheral blood monocytes obtained from healthy donors with kasugamycin. Kasugamycin treatment significantly increased ISG expression in human monocytes similar to Poly I:C treatment (Fig. 3d). Six hours of kasugamycin treatment was sufficient to induce robust ISG expression and significantly reduce replication of influenza A virus in monocytes (Fig. 3e). Collectively, our results demonstrate that aminoglycosides provide antiviral protection against a diverse set of DNA and RNA viruses: HSV-2, influenza A virus and ZIKV.

## **Aminoglycoside induction of ISGs is independent of cytosolic DNA sensor signaling.**

Since neomycin treatment resulted in increased expression of genes in nucleic acid sensing pathways, we asked if cytosolic or endosomal nucleic acid sensing pathways were involved. To test the requirement of cytosolic nucleic acid sensors, mice lacking the RIG-I like receptor signaling adaptor *Mavs*, or the cytosolic DNA sensor cGAS, and its downstream adapter STING (*Tmem173*) were treated with neomycin or PBS and subsequent vaginal gene expression was examined. While neomycin induction of ISG expression was intact in cGAS or STING knockout mice, neomycin-treated MAVS knockout hosts showed relatively lower levels of ISG induction (Supplementary Fig. 5a,d). Infection of neomycin-treated MAVS knockout hosts resulted in reduced protection

(Supplementary Fig. 5b,c). By contrast, neomycin-treatment of STING knockout mice resulted in robust antiviral protection with significantly suppressed viral replication and little to no disease pathology (Supplementary Fig. 5e,f). These results indicate that the cytosolic DNA sensor signaling pathway is dispensable for ISG induction by neomycin, while RNA sensor signaling pathways play a partial role in aminoglycoside-mediated ISG induction.

### **Neomycin mediates antiviral effect by inducing ISG expression via activation of the TLR3-TRIF-IRF3/7 pathway.**

We next investigated the role of endosomal RNA sensors. While TLR7 signaling was dispensable for aminoglycoside-mediated antiviral protection (Supplementary Fig. 6a,b), we found that treatment of *Tlr3*<sup>-/-</sup> mice with neomycin resulted in no ISG induction (Fig. 4a) and this was accompanied by significant loss of protection against HSV-2 infection with higher disease score and vaginal viral titers (Fig. 4b,c). TLR3 signals via the adaptor protein TRIF<sup>21</sup>. To confirm the activation of TLR3 signaling pathway in aminoglycoside-mediated antiviral protection, we treated *Trif*<sup>-/-</sup> mice with neomycin. ISG induction was diminished in *Trif*<sup>-/-</sup> mice as compared to neomycin-treated WT mice (Fig. 4d). This lack of ISG induction was accompanied by a lack of protection against genital HSV-2 infection, as neomycin-treated *Trif*<sup>-/-</sup> mice had equivalent vaginal viral titers and similar disease scores as compared to PBS controls (Fig. 4e,f). Finally, we investigated the role of transcription factors downstream of TLR3 and TRIF signaling. ISGs downstream of cytosolic and endosomal nucleic acid sensors require IRF3 and IRF7 for induction<sup>22</sup>. *Irf3*<sup>-/-</sup> *Irf7*<sup>-/-</sup> mice were treated with neomycin or PBS for one week and vaginal gene transcription analyzed. Similar to *Trif*<sup>-/-</sup> and *Tlr3*<sup>-/-</sup> mice, no upregulation of ISGs was observed in neomycin-treated *Irf3*<sup>-/-</sup> *Irf7*<sup>-/-</sup> mice as compared to PBS-treated controls (Fig. 4g) and this lack of ISG induction resulted in lack of protection against HSV-2 infection (Fig. 4h,i). Induction of ISGs via IRF3 and IRF7 often requires signaling through the type I IFN receptor (IFNAR)<sup>23</sup>

248 but IFN-independent ISG induction has also been reported <sup>24</sup>. We observed increased  
 249 induction of ISG expression upon neomycin treatment in *Ifnar1*<sup>-/-</sup> mice suggesting that  
 250 IFNAR signaling is dispensable (Supplementary Fig. 7a). However, since basal ISG  
 251 expression was much lower in *Ifnar1*<sup>-/-</sup> mice as compared to WT, neomycin treatment only  
 252 increased gene expression to those of untreated WT mice, thus neomycin treatment was  
 253 not accompanied by significant antiviral protection (Supplementary Fig. 7b,c). Collectively,  
 254 our results suggest that neomycin induces ISG expression via activation of TLR3-TRIF-  
 255 IRF3/7 signaling pathway to confer protection against HSV-2.

256

### 257 **Recruited dendritic cells are required to induce ISGs following neomycin application**

258 We next examined the cell types responsible for ISG induction and antiviral protection in  
 259 the vaginal mucosa upon neomycin treatment. Since the vaginal mucosa is composed of  
 260 stratified squamous epithelial cells, small numbers of resident leukocytes and circulating  
 261 leukocytes, we investigated whether ISG induction by neomycin requires tissue resident  
 262 cells or circulating leukocytes. To determine if circulating leukocytes were responsible for  
 263 increased ISG expression, we blocked cellular recruitment by treating mice intravaginally  
 264 with pertussis toxin. Pertussis toxin (PTX) blocks Gi-protein coupled receptor signaling,  
 265 thereby preventing most chemokine-mediated cellular recruitment to the vaginal mucosa  
 266 when applied intravaginally <sup>25</sup>. Treatment with PTX ablated the protective effect of  
 267 neomycin as mice treated with both pertussis toxin and neomycin prior to infection had  
 268 significantly reduced vaginal ISG expression compared to PTX-untreated mice (Fig. 5a).  
 269 This absence of ISG expression resulted in significantly higher levels of mucosal viral titers  
 270 and an increase in disease pathology upon HSV-2 infection (Fig. 5b,c). These results  
 271 suggested that cellular recruitment to the vaginal tissue is prerequisite to the enhanced  
 272 ISG induction and protection against HSV-2 conferred by topical neomycin treatment.



273 To determine the specific cell types recruited to the vaginal mucosa upon neomycin  
 274 treatment, we compared the cellular composition of the vaginal mucosa in mice treated  
 275 with neomycin and those treated with neomycin and PTX. Monocytes (CD11b<sup>+</sup>),  
 276 monocyte-derived DCs (CD11b<sup>+</sup>CD11c<sup>+</sup>) and classical DCs (CD11c<sup>+</sup>), were significantly  
 277 increased upon neomycin treatment (Fig. 5d,e). However, PTX treatment of neomycin-  
 278 inoculated mice resulted in significant blockade of CD11c<sup>+</sup> and CD11b<sup>+</sup>CD11c<sup>+</sup> cells (Fig.  
 279 5e), suggesting that one or both of these cell types might be responsible for the neomycin-  
 280 induced ISGs in the vaginal mucosa.

281 To test this hypothesis, we isolated CD11c<sup>+</sup> cells from the vaginal tissue of neomycin-  
 282 treated and control mice and found significant increases in transcripts of ISGs  
 283 (Supplementary Fig. 8). Likewise, these recruited CD11c<sup>+</sup> cells were also found to express  
 284 IFN $\beta$  (Supplementary Fig. 9a). To determine whether DCs are required for the increase in  
 285 ISG expression following neomycin application, we treated CD11c-DTR mice with  
 286 diphtheria toxin to deplete DCs and then administered neomycin intravaginally. In the  
 287 absence of DCs, neomycin treatment failed to increase vaginal ISG expression (Fig. 5f).  
 288 Collectively, our results suggest that recruited DCs are necessary for aminoglycoside-  
 289 mediated ISG expression.

290

## 291 **XCR1<sup>+</sup>DCs are recruited to the vaginal mucosa upon neomycin treatment and are** 292 **required for ISG induction**

293 Since DCs are required for ISG induction by neomycin, and both monocyte-derived and  
 294 classical DCs are recruited to the vaginal mucosa, we wondered if TLR3 expression could  
 295 be used to identify the specific DC subset involved. It is well known that TLR3 is expressed  
 296 selectively by the cDC1 and not cDC2 (Refs. <sup>26,27</sup>). Examining TLR3 expression across all  
 297 DC subsets using the RNA sequencing datasets deposited in the Immunological Genome  
 298 project <sup>28</sup> confirmed a single cDC subset with high levels of TLR3 expression – CD8 $\alpha$ <sup>+</sup>



299 DCs (cDC1) from the thymus and spleen (Supplementary Fig. 10). In non-lymphoid tissue,  
300 these cells are characterized as CD103<sup>+</sup> DCs and both subsets express high levels of  
301 TLR3 (Ref. <sup>29</sup>). Recent studies have identified XCR1 as a defining cell surface marker for  
302 cDC1 subset <sup>30</sup>. Thus, we measured the recruitment of XCR<sup>+</sup>CD103<sup>+</sup> DCs in the vaginal  
303 mucosa. Neomycin treatment resulted in significant recruitment of CD103<sup>+</sup> XCR1<sup>+</sup>DCs  
304 that were ablated upon treatment with pertussis toxin (Fig. 6a,b). To determine if this was  
305 the DC subtype responsible for ISG induction by aminoglycosides, we depleted mice of  
306 XCR1<sup>+</sup> DCs <sup>31</sup> before intravaginal aminoglycoside treatment. Mice lacking XCR1<sup>+</sup> DCs  
307 showed no induction of ISG expression upon aminoglycoside treatment (Fig. 6c). These  
308 data suggested that mucosal application of aminoglycosides induce ISGs in TLR3 and  
309 XCR<sup>+</sup> DC-dependent manner to confer antiviral protection.

310 Parenteral administration of aminoglycosides has known toxic side-effects including  
311 ototoxicity and nephrotoxicity <sup>32</sup>. Aminoglycoside compounds can accumulate in the  
312 sensory hair cells of the inner ear causing caspase-mediated cell death which results in  
313 irreversible hearing loss <sup>33-35</sup>. While nephrotoxicity can be reversible, significant necrosis  
314 can occur resulting in kidney dysfunction <sup>36,37</sup>. However, we observed no toxicity in mice  
315 treated with intravaginal aminoglycosides. To determine if intravaginal aminoglycoside  
316 treatment resulted in mucosal toxicity, we conducted blinded histological analysis of  
317 aminoglycoside-treated and control vaginal tissues which found no histopathological  
318 differences between two groups (Supplementary Fig. 11a). Likewise, ex-vivo treatment of  
319 splenocytes with aminoglycosides induced robust ISG expression with little accompanying  
320 toxicity (Supplementary Fig. 11b-d. Similar to our in-vivo results, depletion of DCs resulted  
321 in significant loss of ISG induction (Supplementary Fig. 11e).

322

### 323 **Aminoglycoside enhances dsRNA stimulation of TLR3**

324 Aminoglycosides acts by binding bacterial ribosomal RNA, but it also binds mitochondrial  
 325 and mammalian ribosomal RNA<sup>38-40</sup>. Our data show that aminoglycoside induction of ISG  
 326 requires TLR3, which is a sensor of dsRNA. Thus, we tested if aminoglycosides induce  
 327 ISG expression by rendering host RNA more 'visible' to TLR3 in neighboring DCs. To test  
 328 this, we first treated splenocytes with kasugamycin and washed the cells multiple times to  
 329 remove extracellular aminoglycosides. Next, we incubated these kasugamycin-treated  
 330 cells with splenic DCs that include XCR1+ DCs from WT and TLR3 knockout mice and  
 331 measured DC-specific ISG expression. Incubation with kasugamycin-treated splenocytes  
 332 was sufficient to increase ISG expression in WT but not TLR3<sup>-/-</sup> DCs (Supplementary Fig.  
 333 12).

334 These data led us to hypothesize that aminoglycosides may bind to dsRNA and render  
 335 them more potent for TLR3 activation. To test this, we treated splenocytes with a  
 336 combination of aminoglycosides and dsRNA Poly I:C. We found that a 1:1000 ratio of Poly  
 337 I:C to kasugamycin significantly induced ISG expression at greater levels than either  
 338 compound alone (Supplementary Fig. 13). This enhancement was dependent on both  
 339 TLR3 and TRIF signaling (Supplementary Fig. 13). Collectively, these data indicate that at  
 340 high molar ratio, kasugamycin synergizes with dsRNA to stimulate TLR3.

341

## 342 Discussion

343 Our data show an unexpected antiviral effect of aminoglycosides in mucosal tissues.  
 344 Vaginal application of antibiotic cocktail conferred resistance against both DNA and RNA  
 345 viruses. A single antibiotic, neomycin, was responsible for the protection and this  
 346 protection extended to multiple members of the aminoglycoside family. Surprisingly,  
 347 aminoglycoside-mediated antiviral protection occurred in germ free mice, indicating a  
 348 microbiome-independent mechanism of resistance. Mucosal aminoglycoside treatment  
 349 recruited XCR1+ dendritic cells, and induced ISGs expression via TLR3, TRIF and

transcription factors IRF3 and IRF7. Finally, this antiviral protection could be extended to both the nasal mucosa and primary human monocytes.

Other antibiotic compounds have been previously reported to inhibit viral replication. Several screens of bioactive compounds for antiviral activity have identified antibiotic compounds including azithromycin and nanchangmycin<sup>41,42</sup>. Azithromycin, a macrolide antibiotic, potently inhibits Zika virus replication in cell culture via an as yet unknown mechanism<sup>42</sup>. Nanchangmycin was also originally identified in a screen for antiviral compounds effective against ZIKV. Pretreatment of cells with this antibiotic blocks entry of many flaviviruses including dengue virus and chikungunya virus by inhibiting clathrin-mediated endocytosis<sup>41</sup>. Chloroquine, a member of the quinolone family of antimalarials has also demonstrated broad antiviral activity<sup>43-45</sup> and is thought to reduce viral replication by interfering with endosome acidification<sup>46</sup>. These studies collectively highlight the unexpected antiviral functions of antibiotics, albeit through distinct downstream pathways.

Our study identifies a class of antibiotics, aminoglycosides, which mediate their antiviral activity by increasing host expression of a broad range of ISGs, potentially reducing the opportunity for viruses to develop resistance. Of note, a previous study demonstrated the ability of anthracyclines (chemotherapy agents that are natural products of *Streptomyces* bacteria) to also induce ISG expression in cancer cells in a TLR3-dependent manner<sup>47</sup>. Thus, bacterial products with nucleic acid binding capacity may have the ability to trigger TLR3 and possibly other PRRs.

How do aminoglycosides induce ISGs? Our results indicate that aminoglycoside treatment in the vaginal mucosa results in the increased expression of chemokines and is accompanied by recruitment of monocyte-derived DCs and cDCs. Blocking this recruitment through PTX treatment, or depletion of DCs, aborted the ISG response. With TLR3 as the key sensor required for ISGs and as only cDC1 expresses TLR3 (Ref.<sup>29</sup>), we

375 further determined that XCR1+ cDC1 were required for ISG induction in the vaginal  
376 mucosa.

377 Aminoglycosides could be taken up by these DCs via endocytosis <sup>48</sup> or through TRPV  
378 family of ion channels <sup>49</sup> which are also expressed on DCs <sup>50</sup>. Aminoglycosides are known  
379 for inducing cytotoxicity in specific cell types such as the hair cells of the inner ear and  
380 kidney epithelial cells <sup>32,33,36</sup> but their effect on immune cells has not been well  
381 characterized. Aminoglycosides may also be taken up by the vaginal epithelial cells via the  
382 megalin receptor which has been shown to bind these compounds <sup>51,52</sup>. While we  
383 observed no inflammation or cytotoxicity in aminoglycoside-treated vaginal tissues  
384 (Supplementary Fig. 11), we cannot rule out phagocytosis of nearby dead or dying cells by  
385 DCs. In support of this hypothesis, incubation of these DCs with kasugamycin-treated  
386 splenocytes was sufficient to induce ISG expression albeit at lower levels than direct  
387 aminoglycoside treatment (Supplementary Fig. 12). As XCR1+DCs are known for their  
388 cross-presentation of antigens associated with dead cells <sup>53,54</sup>, it is conceivable that in the  
389 vaginal mucosa, phagocytosis of aminoglycoside-containing epithelial cells results in TLR3  
390 activation due to the accumulation of aminoglycoside-bound RNA in the endosome.

391 The specific RNA bound by the aminoglycoside that triggers TLR3 remains unknown. The  
392 interaction of aminoglycosides with mitochondrial ribosomal RNA, which is closely related  
393 to bacterial ribosomal RNA, is well characterized and aminoglycosides have also been  
394 found to bind mitochondrial ribosomal RNA at multiple sites <sup>38,55</sup>. It is possible that  
395 mitochondrial rRNA-bound aminoglycosides might activate TLR3 in XCR1+ DCs in the  
396 endosome. Our results show that aminoglycoside and Poly I:C can synergize to induce  
397 increased ISG expression (Supplementary Fig. 13). Future studies are needed to identify  
398 the manner in which aminoglycoside-bound RNA stimulate TLR3.

399 Our results demonstrate a surprising and broad antiviral effect of the aminoglycoside  
400 family of antibiotics, when applied to mucosal surfaces. However, we do not advocate for

401 use of these compounds as antivirals, as aminoglycoside application is expected to cause  
402 local dysbiosis of commensal bacterial community. Understanding the precise mechanism  
403 by which aminoglycosides induce TLR3 stimulation will be useful for the future design of  
404 broad-acting antivirals.

405

## 406 **Materials and methods**

407 **Mice:** C57BL/6 (B6; Charles River Laboratories), B6(Cg)-Ifnar1<sup>tm1.2Ees/J</sup> (*Ifnar1*<sup>-/-</sup>),  
 408 B6.FVB-Tg(Ilgax-DTR/EGFP)57Lan/J (CD11cDTR), C57BL/6J-*Ticam1*<sup>Lps2/J</sup> (*Trif*<sup>-/-</sup>) mice,  
 409 C57BL/6J-*Tmem173*<sup>gt/J</sup> (STING<sup>-/-</sup>) and B6.129S1-*Tlr7*<sup>tm1Flv/J</sup> (TLR7<sup>-/-</sup>), B6.129-*Ifnb1*<sup>tm1Lky/J</sup>  
 410 (IFNβYFP reporter), B6;129S1-*Tlr3*<sup>tm1Flv/J</sup> (TLR3<sup>-/-</sup>) and B6129SF2/J controls were  
 411 purchased from Jackson Laboratory unless otherwise specified and subsequently bred  
 412 and housed at Yale University. *Irf3*<sup>-/-</sup> *Irf7*<sup>-/-</sup> (Ref. <sup>22</sup>) (generous gift by Dr. T. Taniguchi, the  
 413 University of Tokyo), *Mavs*<sup>-/-</sup> (Ref. <sup>56</sup>) (generous gift by Dr. Z. Chen, UTSW), B6.Cg-  
 414 *Xcr1*<sup>tm2(HBEGF/Venus)Ksho</sup> (XCR1-DTR) (Ref <sup>31</sup>) are previously described. C57BL/6 mice  
 415 carrying functional Mx1 alleles have were a generous gift by Dr. P. Staeheli <sup>57</sup> (University  
 416 Medical Center Freiburg). Mice were maintained in our facility until the ages described.  
 417 Germ-free Swiss Webster mice were maintained in flexible plastic gnotobiotic isolators  
 418 with a 12 hr light/dark cycle and provided a standard, autoclaved mouse chow (5K67  
 419 LabDiet, Purina) ad libitum and autoclaved water for the duration of the experiment. Germ-  
 420 free status was monitored by culture-based (aerobic and anaerobic culturing) and culture-  
 421 independent methods (16S-targeted PCR). All procedures used in this study complied with  
 422 federal and institutional policies of the Yale Animal Care and Use committee.

423 **Viruses:** Wild-type HSV-2 (strain 186syn+) was a kind gift from Dr. David Knipe (Harvard  
 424 Medical School, Boston, MA). HSV strain was maintained and propagated in Vero cells.  
 425 Highly virulent variant of A/PR8 (Ref. <sup>19</sup>) was a generous gift from Dr. P. Staeheli  
 426 (University Medical Center Freiburg). Influenza virus strain A/PR/8/34 (H1N1) was  
 427 propagated as previously described <sup>18</sup>. ZIKV Cambodian FSS13025 strain was obtained  
 428 from the World Reference Center for Emerging Viruses and Arboviruses at University of  
 429 Texas Medical Branch, Galveston.

430 **Mouse infections and antibiotic treatment:** C57BL/6 mice between six and seventeen  
 431 weeks of age were subcutaneously injected with 2 milligrams of Depo-Provera in the neck

432 scruff. Five days after Depo treatment, the mice were vaginally swabbed with a calcium  
 433 alginate swab (Puritan, Maine) to remove vaginal mucus. The swab was wetted in sterile  
 434 PBS and blotted on sterile paper to get rid of excess liquid before being used. Ten to 15  
 435 microliters of antibiotic or PBS was delivered into the vaginal cavity using a pipette tip.  
 436 After 2-6 days of daily antibiotic treatment, mice were infected intravaginally with  $2 \times 10^3$  to  
 437  $5 \times 10^3$  PFU HSV-2,  $10^6$  PFU HSV-1 or  $2.5 \times 10^5$  PFU ZIKV. Infections were carried out  
 438 24 hours after the last antibiotic treatment. At the time of infection, mice were weighed and  
 439 subsequently examined at the same time each day to minimize fluctuations in weight due  
 440 to circadian rhythms. Vaginal viral titers were collected by swabbing mice and flushing the  
 441 vaginal cavity with 50 microliters of PBS. Mice were monitored daily for signs of  
 442 inflammatory pathology scored as follows: (0) no inflammation, (1) genital inflammation, (2)  
 443 genital lesions and hair loss, (3) hunched posture and ruffled fur, (4) hind-limb paralysis  
 444 and (5) premonitory. Mice were euthanized before reaching a moribund state. Intranasal  
 445 influenza infections were conducted as described previously<sup>18</sup>. Briefly, mice were  
 446 anesthetized using a mixture of ketamine and xylazine injected i.p. and infected with 500  
 447 PFU highly virulent A/PR8 influenza strain. All mouse experiments were carried out with a  
 448 minimum of 3-4 mice per treatment group. With the exception of the germ-free mouse  
 449 infections and experiments with XCR1<sup>DTR</sup> mice, all other experiments were independently  
 450 repeated at least once. These experiments were only conducted once with a total n=5. All  
 451 animal procedures were performed in compliance with Yale Institutional Animal Care and  
 452 Use Committee protocols.

453 **Antibiotic treatment:** The antibiotic cocktail consisted of 0.5mgs Ampicillin, Vancomycin  
 454 and Neomycin and 0.01 milligram metronidazole in a 15 $\mu$ l volume. For subsequent  
 455 experiments using neomycin alone, mice were treated with 1 milligram in a volume of 10 $\mu$ l.  
 456 For intranasal treatment, mice were anesthetized by injecting a mixture of ketamine and

457 xylazine intraperitoneally and 20µL of antibiotic administered dropwise into the nasal cavity  
 458 using a pipet tip. All antibiotics were obtained from Sigma-Aldrich (Darmstadt, Germany).

459 **Microarray analysis:** Mice were treated daily with neomycin (1mg/day) or PBS for six  
 460 days and then sacrificed and vaginal tissue harvested. RNA was extracted from the  
 461 vaginal tissues using an RNeasy extraction kit (Qiagen,CA) and hybridized onto  
 462 MouseWG-6 v2 Expression arrays (Illumina,CA) at the Yale Center for Genome Analysis.  
 463 Microarray data was visualized in R using ggplot2.

464 **Gene expression analysis:** The following primers were used for mouse ISG expression  
 465 *Hprt* (FP: GTTGGATACAGGCCAGACTTTGTTG, RP:  
 466 GAGGGTAGGCTGGCCTATTGGCT); *Zbp1* (FP: TTGCCAATTCAAACGCCATC, RP:  
 467 CACTTGTTGGAGCAAGGACT); *Cxcl10* (FP: AGAATGAGGGCCATAGGGAA, RP:  
 468 CGTGGCAATGATCTCAACAC); *Usp18* (FP: CGTGCTTGAGAGGGTCATTTG, RP:  
 469 GGTCCGGAGTCCACAACCTTC); *Irf7* (FP: TGTAGACGGAGCAATGGCTGAAGT, RP:  
 470 ATCCCTACGACCGAAATGCTTCCA); *Oas12* (FP: GGGAGGTCGTCATCAGCTTC, RP:  
 471 CCCTTTTGCCCTCTCTGTGG); *Oas1a* (FP: ATTACCTCCTTCCCGACACC, RP:  
 472 CAACTCCACCTCCTGATGC); *Rsad2* (Viperin) (FP: AACAGGCTGGTTTGGAGAAG  
 473 RP: TGCCATTGCTCACTATGCTC); *Mx1* (FP: CCAACTGGAATCCTCCTGGAA, RP:  
 474 GCCGCACCTTCTCCTCATAG). The following primers were used for human ISG  
 475 expression: *HPRT* (FP: TGGTCAGGCAGTATAATCCAAAG, RP:  
 476 TTTCAAATCCAACAAAGTCTGGC); *OAS1* (FP: CTGAGAAGGCAGCTCACGAA, RP:  
 477 TGTGCTGGGTCAGCAGAATC); *OASL* (FP: AAAAGAGAGGCCCATCATCCT, RP:  
 478 CCTCTGCTCCACTGTCAAGT); *CXCL9* (FP: AGTGCAAGGAACCCCAGTAG RP:  
 479 AGGGCTTGGGGCAAATTGTT); *CXCL10* (FP:CCACGTGTTGAGATCATTGCT RP:  
 480 TGCATCGATTTTGCTCCCCT); *USP18* (FP:GGCTCCTGAGGCAAATCTGT RP:  
 481 CAACCAGGCCATGAGGGTAG ); *MX1* (FP: AGAGAAGGTGAGAAGCTGATCC; RP:  
 482 TTCTTCCAGCTCCTTCTCCTG). qPCR reactions were run in triplicate. The triplicate Ct



483 values, were averaged, normalized against housekeeping genes HPRT and then  
484 compared against biological controls (untreated mice) using the  $\Delta\Delta$  Ct method of  
485 comparison. Fold expression was calculated assuming a doubling efficiency (2) per cycle.  
486 (Fold expression =  $2^{-\Delta\Delta C_t}$ )

487 **Flow Cytometry Analysis:** Single cell populations were isolated from vaginal tissue as  
488 previously described<sup>58</sup>. Briefly, vaginal tissue was minced into small pieces and digested  
489 first with Dispase II for 15 minutes and subsequently with a combination of DNase I (.045  
490 mg/ml) and Collagenase (2 mg/ml) for 30 minutes. All digestions were carried out in a  
491 37°C shaking water bath. All enzymes were obtained from Sigma-Aldrich. Cells were spun  
492 down and dead cells excluded using a live/dead stain (Molecular Probes, Thermo Fisher),  
493 then stained with appropriate antibodies, fixed with 1% Paraformaldehyde (Electron  
494 Microscopy Sciences, PA) and run through an LSR II (BD, NJ) equipped with a UV laser.  
495 FlowJo software (Tree Star, OR) was used to visualize and analyze cytometry data. Cells  
496 populations were analyzed as shown in the gating scheme (Supplementary Fig. 14).

497 **Antibodies:** The following antibodies were used for this study, all purchased from  
498 Biolegend unless specified otherwise: CD45(104), CD3 $\epsilon$  (145-2C11), CD11c (HL3, BD  
499 Biosciences), CD11b (M1/70), CD103 (2E7) XCR1 (ZET), SIRP $\alpha$ (P84), Gr1 (RB6-8C5, BD  
500 Biosciences), NK1.1(PK136), MHC class II I-A/I-E (M5/114.152), CD19 (6D5).

501 **Human Monocyte Isolation and Infection:** Peripheral blood mononuclear cells were  
502 obtained from the New York Blood Bank Center (NY) and monocytes isolated using a  
503 negative selection kit (Stemcell Technologies, MA). Monocytes were treated with Polyl:C  
504 (Sigma) or aminoglycosides at 2 $\mu$ g/ml and 2 mg/ml respectively for 6 hours. Cells were  
505 washed once and infected with Influenza A virus strain A/PR/8/34 (H1N1) at a multiplicity  
506 of infection of 2. Cells were incubated with the virus for 1 hour in 0.1%BSA in PBS. Cells  
507 were then washed once and incubated in DMEM containing 10%FBS, Pen/Strep, Sodium  
508 pyruvate and Hepes. RNA was isolated using an RNeasy extraction kit (Qiagen, CA) and

509 viral RNA quantified using primers against Influenza A PR8 Polymerase A  
510 (FP:CGGTCCAAATTCCTGCTGAT; RP: CATTGGGTTCCTTCCATCCA).

511 **Viral Titer:** Vaginal washes were collected in 50  $\mu$ l PBS and saved in 950  $\mu$ l PBS  
512 supplemented with 1% FBS, 10 mg/ml glucose 0.5  $\mu$ M MgCl<sub>2</sub> and 0.9  $\mu$ M CaCl<sub>2</sub>. Washes  
513 were added in serial dilutions to a confluent monolayer of Vero cells and plaques  
514 visualized via crystal violet staining. ZIKV genome was quantified via qRT-PCR as  
515 previously described <sup>20</sup>. Briefly, cDNA prepared from vaginal washes was compared  
516 against a standard curve composed of purified ZIKV viral genomes. Primers against NS5  
517 (F: GGCCACGAGTCTGTACCAAA; R: AGCTTCACTGCAGTCTTCC) were used to  
518 measure ZIKV RNA.

519 **In-vitro treatments:** Single cell splenocytes were plated at the density of  $5 \times 10^6$  cells/ml  
520 isolated and treated with kasugamycin (2mg/ml or 0.02mg/ml) and PolyI:C (High Molecular  
521 Weight, Invivogen,CA) (2 $\mu$ g/ml or 0.02 $\mu$ g/ml) for 6 hours. Mixtures of PolyI:C and  
522 kasugamycin were incubated together for 30 minutes at 37°C before addition to cells. In  
523 Supplementary Fig. 13, splenocytes were treated for 12 hours, washed 5 times, stained  
524 with cell trace violet (Thermo Fisher, CA), and incubated with splenic DCs isolated using  
525 PanDC separation kit (Stemcell Technologies, MA). After 6 hour incubation, cell trace  
526 violet dim and negative cells were sorted using an FACS Aria (BD, NJ) into RLT buffer for  
527 RNA extraction.

528 **Statistics:** Gene expression data was analyzed using unpaired t-tests, assuming unequal  
529 standard deviation and correcting for multiple comparisons using the Holm-Sidak  
530 correction unless otherwise specified. Graphs depicting disease scores were analyzed  
531 using 2-way ANOVA with Holm-Sidak correction for multiple comparisons. Graphs  
532 depicting viral titers across a time course of infection were analyzed using 2-way ANOVA  
533 with no correction for multiple comparisons (Fisher's LSD) unless otherwise specified.  
534 Survival curves were analyzed using the log-rank (Mantel-Cox) test. P values not reported

535 in the figures themselves can be found in Supplementary Table 2. All statistical analyses  
536 were performed in Graphpad Prism v7.0.

537 **Data Availability:** The data discussed in this publication have been deposited in NCBI's  
538 Gene Expression Omnibus<sup>59</sup> and are accessible through GEO Series accession number  
539 GSE94909 (<https://www.ncbi.nlm.nih.gov/geo/query/acc.cgi?acc=GSE94909>).

## 540 **Acknowledgments**

541 We thank Dr. Yong Kong for his help analyzing the microarray data, and Huiping Dong for  
542 animal support. We thank Punya Biswal for help with visualizing the microarray data. This  
543 study was supported by funding from the NIH AI054359, R56AI125504, R01EB000487  
544 and 1R21AI131284 (to AI). AI and AG are Investigator and Faculty Scholar of Howard  
545 Hughes Medical Institute. SG and MK are recipients of the James Hudson Brown -  
546 Alexander Brown Coxe Postdoctoral Fellowships at Yale University.

547

## 548 **Competing Interests**

549 The authors have no competing interest to report.

550

# References

1. Badal, S., Her, Y. F. & Maher, L. J. Nonantibiotic Effects of Fluoroquinolones in Mammalian Cells. *J. Biol. Chem.* **290**, 22287–22297 (2015).
2. Kalghatgi, S. *et al.* Bactericidal antibiotics induce mitochondrial dysfunction and oxidative damage in Mammalian cells. *Science Translational Medicine* **5**, 192ra85 (2013).
3. Moullan, N. *et al.* Tetracyclines Disturb Mitochondrial Function across Eukaryotic Models: A Call for Caution in Biomedical Research. *CellReports* **10**, 1681–1691 (2015).
4. Yang, J. H. *et al.* Antibiotic-Induced Changes to the Host Metabolic Environment Inhibit Drug Efficacy and Alter Immune Function. *Cell Host & Microbe* 1–13 (2017). doi:10.1016/j.chom.2017.10.020
5. Linehan, M. M. *et al.* In Vivo Role of Nectin-1 in Entry of Herpes Simplex Virus Type 1 (HSV-1) and HSV-2 through the Vaginal Mucosa. *Journal of Virology* **78**, 2530–2536 (2004).
6. Shin, H. & Iwasaki, A. Generating protective immunity against genital herpes. *Trends in Immunology* **34**, 487–494 (2013).
7. Corey, L. & Schiffer, J. T. Rapid host immune response and viral dynamics in herpes simplex virus-2 infection. *Nature Medicine* **19**, 280–290 (2013).
8. Khoury-Hanold, W. *et al.* Viral Spread to Enteric Neurons Links Genital HSV-1 Infection to Toxic Megacolon and Lethality. *Cell Host & Microbe* **19**, 788–799 (2016).
9. McDermott, M. R. *et al.* Immunity in the female genital tract after intravaginal vaccination of mice with an attenuated strain of herpes simplex virus type 2. *Journal of Virology* **51**, 747–753 (1984).
10. Busscher, G. F., Rutjes, F. P. J. T. & van Delft, F. L. 2-Deoxystreptamine: Central Scaffold of Aminoglycoside Antibiotics †. *Chem. Rev.* **105**, 775–792 (2005).
11. Wilson, D. N. Ribosome-targeting antibiotics and mechanisms of bacterial resistance. *Nat Rev Micro* **12**, 35–48 (2014).
12. Morgun, A. *et al.* Uncovering effects of antibiotics on the host and microbiota using transkingdom gene networks. *Gut* **64**, 1732–1743 (2015).
13. Staeheli, P., Grob, R., Meier, E., Sutcliffe, J. G. & Haller, O. Influenza virus-susceptible mice carry Mx genes with a large deletion or a nonsense mutation. *Mol. Cell. Biol.* **8**, 4518–4523 (1988).
14. Meier, E. *et al.* A family of interferon-induced Mx-related mRNAs encodes cytoplasmic and nuclear proteins in rat cells. *Journal of Virology* **62**, 2386–2393 (1988).
15. Staeheli, P. *et al.* Interferon-regulated influenza virus resistance gene Mx is localized on mouse chromosome 16. *Journal of Virology* **58**, 967–969 (1986).
16. Haller, O., Staeheli, P., Schwemmler, M. & Kochs, G. Mx GTPases: dynamin-like antiviral machines of innate immunity. *Trends Microbiol.* **23**, 154–163 (2015).
17. Dreiding, P., Staeheli, P. & Haller, O. Interferon-induced protein Mx accumulates in nuclei of mouse cells expressing resistance to influenza viruses. *Virology* **140**, 192–196 (1985).
18. Ichinohe, T. *et al.* Microbiota regulates immune defense against respiratory tract influenza A virus infection. *Proc. Natl. Acad. Sci. U.S.A.* **108**, 5354–5359 (2011).
19. Grimm, D. *et al.* Replication fitness determines high virulence of influenza A virus in mice carrying functional Mx1 resistance gene. *Proc Natl Acad Sci U S A* **104**, 6806–6811 (2007).
20. Yockey, L. J. *et al.* Vaginal Exposure to Zika Virus during Pregnancy Leads to Fetal Brain Infection. *Cell* **166**, 1247–1256.e4 (2016).
21. Yamamoto, M. *et al.* Role of adaptor TRIF in the MyD88-independent toll-like

- 602 receptor signaling pathway. *Science* **301**, 640–643 (2003).
- 603 22. Honda, K. *et al.* IRF-7 is the master regulator of type-I interferon-dependent immune  
604 responses. *Nature* **434**, 772–777 (2005).
- 605 23. Schneider, W. M., Chevillotte, M. D. & Rice, C. M. Interferon-Stimulated Genes: A  
606 Complex Web of Host Defenses. *Annu. Rev. Immunol.* **32**, 513–545 (2014).
- 607 24. Schmid, S., Mordstein, M., Kochs, G., Garcia-Sastre, A. & tenOever, B. R.  
608 Transcription Factor Redundancy Ensures Induction of the Antiviral State. *J. Biol.*  
609 *Chem.* **285**, 42013–42022 (2010).
- 610 25. Iijima, N. & Iwasaki, A. T cell memory. A local macrophage chemokine network  
611 sustains protective tissue-resident memory CD4 T cells. *Science* **346**, 93–98 (2014).
- 612 26. Shortman, K. & Heath, W. R. The CD8<sup>+</sup> dendritic cell subset. *Immunol. Rev.* **234**,  
613 18–31 (2010).
- 614 27. Schulz, O. *et al.* Toll-like receptor 3 promotes cross-priming to virus-infected cells.  
615 *Nature* **433**, 887–892 (2005).
- 616 28. Heng, T. S. P., Painter, M. W. Immunological Genome Project Consortium. The  
617 Immunological Genome Project: networks of gene expression in immune cells. *Nat*  
618 *Immunol* **9**, 1091–1094 (2008).
- 619 29. Miller, J. C. *et al.* Deciphering the transcriptional network of the dendritic cell lineage.  
620 *Nat Immunol* 1–14 (2012). doi:10.1038/ni.2370
- 621 30. Crozat, K. *et al.* Cutting Edge: Expression of XCR1 Defines Mouse Lymphoid-Tissue  
622 Resident and Migratory Dendritic Cells of the CD8<sup>+</sup> Type. *Journal of immunology*  
623 **187**, 4411–4415 (2011).
- 624 31. Yamazaki, C. *et al.* Critical roles of a dendritic cell subset expressing a chemokine  
625 receptor, XCR1. *The Journal of Immunology* **190**, 6071–6082 (2013).
- 626 32. Begg, E. J. & Barclay, M. L. Aminoglycosides--50 years on. *Br J Clin Pharmacol* **39**,  
627 597–603 (1995).
- 628 33. Rizzi, M. D. & Hirose, K. Aminoglycoside ototoxicity. *Curr Opin Otolaryngol Head*  
629 *Neck Surg* **15**, 352–357 (2007).
- 630 34. Matsui, J. I., Gale, J. E. & Warchol, M. E. Critical signaling events during the  
631 aminoglycoside-induced death of sensory hair cells in vitro. *J. Neurobiol.* **61**, 250–  
632 266 (2004).
- 633 35. Cheng, A. G., Cunningham, L. L. & Rubel, E. W. Mechanisms of hair cell death and  
634 protection. *Curr Opin Otolaryngol Head Neck Surg* **13**, 343–348 (2005).
- 635 36. Wargo, K. A. & Edwards, J. D. Aminoglycoside-Induced Nephrotoxicity. *Journal of*  
636 *Pharmacy Practice* **27**, 573–577 (2014).
- 637 37. Laurent, G., Kishore, B. K. & Tulkens, P. M. Aminoglycoside-induced renal  
638 phospholipidosis and nephrotoxicity. *Biochem. Pharmacol.* **40**, 2383–2392 (1990).
- 639 38. Ryu, D. H. & Rando, R. R. Aminoglycoside binding to human and bacterial A-Site  
640 rRNA decoding region constructs. *Bioorg. Med. Chem.* **9**, 2601–2608 (2001).
- 641 39. Recht, M. I., Fourmy, D., Blanchard, S. C., Dahlquist, K. D. & Puglisi, J. D. RNA  
642 sequence determinants for aminoglycoside binding to an A-site rRNA model  
643 oligonucleotide. *J. Mol. Biol.* **262**, 421–436 (1996).
- 644 40. Walter, F., Vicens, Q. & Westhof, E. Aminoglycoside–RNA interactions. *Current*  
645 *Opinion in Chemical Biology* **3**, 694–704 (1999).
- 646 41. Rausch, K. *et al.* Screening Bioactives Reveals Nanchangmycin as a Broad  
647 Spectrum Antiviral Active against Zika Virus. *CellReports* **18**, 804–815 (2017).
- 648 42. Retallack, H. *et al.* Zika virus cell tropism in the developing human brain and  
649 inhibition by azithromycin. *Proc. Natl. Acad. Sci. U.S.A.* **113**, 14408–14413 (2016).
- 650 43. Delvecchio, R. *et al.* Chloroquine, an Endocytosis Blocking Agent, Inhibits Zika Virus  
651 Infection in Different Cell Models. *Viruses* **8**, 322–15 (2016).
- 652 44. Keyaerts, E. *et al.* Antiviral Activity of Chloroquine against Human Coronavirus  
653 OC43 Infection in Newborn Mice. *Antimicrobial Agents and Chemotherapy* **53**,



3416–3421 (2009).

45. Fredericksen, B. L., Wei, B. L., Yao, J., Luo, T. & Garcia, J. V. Inhibition of Endosomal/Lysosomal Degradation Increases the Infectivity of Human Immunodeficiency Virus. *Journal of Virology* **76**, 11440–11446 (2002).
46. Savarino, A., Boelaert, J. R., Cassone, A., Majori, G. & Cauda, R. Effects of chloroquine on viral infections: an old drug against today's diseases. *The Lancet Infectious Diseases* **3**, 722–727 (2003).
47. Sistigu, A. *et al.* Cancer cell–autonomous contribution of type I interferon signaling to the efficacy of chemotherapy. *Nature Medicine* **20**, 1301–1309 (2014).
48. Hashino, E. & Shero, M. Endocytosis of aminoglycoside antibiotics in sensory hair cells. *Brain Research* **704**, 135–140 (1995).
49. Myrdal, S. E. & Steyger, P. S. TRPV1 regulators mediate gentamicin penetration of cultured kidney cells. *Hearing Research* **204**, 170–182 (2005).
50. Assas, B. M., Wakid, M. H., Zakai, H. A., Miyan, J. A. & Pennock, J. L. Transient receptor potential vanilloid 1 expression and function in splenic dendritic cells: a potential role in immune homeostasis. *Immunology* **147**, 292–304 (2016).
51. Moestrup, S. K. *et al.* Evidence that epithelial glycoprotein 330/megalin mediates uptake of polybasic drugs. *J Clin Invest* **96**, 1404–1413 (1995).
52. Christensen, E. I. & Birn, H. Megalin and cubilin: multifunctional endocytic receptors. *Nat Rev Mol Cell Biol* **3**, 258–268 (2002).
53. Iyoda, T. *et al.* The CD8 +Dendritic Cell Subset Selectively Endocytoses Dying Cells in Culture and In Vivo. *J. Exp. Med.* **195**, 1289–1302 (2002).
54. Bedoui, S. *et al.* Cross-presentation of viral and self antigens by skin-derived CD103+ dendritic cells. *Nat Immunol* **10**, 488–495 (2009).
55. Hong, S. *et al.* Evidence That Antibiotics Bind to Human Mitochondrial Ribosomal RNA Has Implications for Aminoglycoside Toxicity. *J. Biol. Chem.* **290**, 19273–19286 (2015).
56. Sun, Q. *et al.* The specific and essential role of MAVS in antiviral innate immune responses. *Immunity* **24**, 633–642 (2006).
57. Horisberger, M. A., Staeheli, P. & Haller, O. Interferon induces a unique protein in mouse cells bearing a gene for resistance to influenza virus. *Proc Natl Acad Sci U S A* **80**, 1910–1914 (1983).
58. Shin, H. & Iwasaki, A. A vaccine strategy that protects against genital herpes by establishing local memory T cells. *Nature* **491**, 463–467 (2012).
59. Edgar, R., Domrachev, M. & Lash, A. E. Gene Expression Omnibus: NCBI gene expression and hybridization array data repository. *Nucleic Acids Research* **30**, 207–210 (2002).

## 693 **Figure Legends**

### 694 **Figure 1: Vaginal application of neomycin confers prophylactic and therapeutic** 695 **antiviral protection against HSV-2 in microbiota-independent manner.**

696 Conventional (a-d, g-h) and germ-free (e,f) mice were treated subcutaneously with Depo-  
697 Provera and five days after treatment were inoculated intravaginally with an antibiotic  
698 cocktail (a,b) or singly with the indicated antibiotic (c-h) daily for 6 days (n = 5 mice per  
699 group). After 1 week of treatment, all mice were infected intravaginally with HSV-2. For  
700 therapeutic neomycin treatment, depo-treated mice were infected with HSV-2, then treated  
701 with 1mg neomycin or PBS at 4hrs, 24hrs, 48hrs and 72hrs after infection (g,h). Disease  
702 score was monitored daily (a,c,e,g) and vaginal wash collected on the first three days  
703 (b,d,f,h). Error bars represent SEM. Significance was calculated using 2-way ANOVA.  
704 Exact p values are reported in Table S2.

705

### 706 **Figure 2: Vaginal application of most aminoglycosides induce interferon-stimulated** 707 **genes, which is linked to antiviral protection.**

708 Microarray analysis of vaginal gene expression in neomycin-treated mice normalized  
709 against PBS-treated mice (n=3 per group) with fold expression and p values plotted (a).  
710 Significantly differentially expressed known genes (fold expression >1.5X, p value <0.05)  
711 are labeled. Ingenuity pathway analysis was used to identify the top ten signaling  
712 pathways enriched upon neomycin treatment (b). In an independent experiment Depo-  
713 treated mice were treated with neomycin or PBS (n=9) and vaginal gene expression  
714 measured via qPCR (c). Mice were treated subcutaneously with Depo-Provera and five  
715 days after treatment were inoculated intravaginally with the indicated aminoglycosides  
716 (1mg/day) for 2 days (n=3 mice per group). Vaginal gene expression was analyzed via  
717 qPCR and all comparisons were made against PBS samples (d). Depo-treated mice were  
718 treated intravaginally with 1 mg of the indicated aminoglycosides daily for 6 days and then

719 infected with HSV-2 (e,f). Disease score was monitored (e) and vaginal viral titers  
720 measured (f). Error bars represent SEM and statistical significance was calculated using  
721 2-way ANOVA. Exact p values for all comparisons are reported in Table S2.

722 **Figure 3: Aminoglycosides confer broad protection against both RNA and DNA**  
723 **viruses.**

724 Intranasal neomycin treatment induces ISG expression in lungs and protects mice against  
725 Influenza virus infection (a,b). Mice were treated intranasally with 2 mgs neomycin (n=5-7)  
726 and ISG expression analyzed 24 hours later in lung tissue (a). Mx1 congenic mice (n=7-8  
727 per group) were pretreated with neomycin (2mgs) or PBS and infected 24 hours later with  
728 highly virulent influenza strain PR8 and survival curves compared using a log rank  
729 (Mantel-Cox) test (b). Depo-treated mice received intravaginal aminoglycoside or PBS  
730 daily for 6 days and were infected with 25,000 PFU ZIKV intravaginally and vaginal viral  
731 titers were calculated via qPCR (c). Primary human monocytes were treated with  
732 kasugamycin (2mg/ml) or Poly I:C (2 $\mu$ g/ml). Six hours after treatment, gene expression  
733 was analyzed (d) and in a separate experiment, kasugamycin-treated monocytes were  
734 infected with Influenza A/PR/8/34 (H1N1) strain at a multiplicity of infection of 2 and RNA  
735 collected 2 and 6 hours post infection. Virus levels were quantified via qPCR using primers  
736 against Polymerase A (e). Error bars represent SEM and significance was calculated using  
737 unpaired t-tests, correcting for multiple comparisons (a,d) or 2-way ANOVA (c,e). Exact p  
738 values for all comparisons are reported in Table S2.

739 **Figure 4: Aminoglycosides mediate antiviral immunity via the TLR3-TRIF-IRF3/7**  
740 **signaling pathway**

741 Depo-treated wildtype and knockout mice of the indicated genotypes (n=3-5) were treated  
742 with 1mg neomycin daily for 6 days and vaginal gene expression measured (a,d,g). In an  
743 independent experiment these mice were infected with HSV-2, disease scores (b,e,h) and  
744 vaginal viral titers measured (c,f,i). 129S1 $\times$ B6 F2 mice were used as wild type controls for



745 TLR3<sup>-/-</sup> mice (b,c) and C57BL/6N mice were used as wildtype controls for remaining (a,d-i).  
 746 Error bars represent SEM. Significance was calculated using 2-way ANOVA (b,e,h) or  
 747 unpaired t-tests correcting for multiple comparisons. Exact p values for all comparisons are  
 748 reported in Table S2.

749 **Figure 5: Recruited dendritic cells are required for ISG induction by neomycin.**

750 Mice treated subcutaneously with Depo-Provera were inoculated intravaginally with  
 751 neomycin (1mg), PBS daily for 6 days (n = 4 mice per group) or neomycin (1mg) and  
 752 pertussis toxin (PTX) (0.5µg) daily. After 1 week of treatment, vaginal gene expression  
 753 was quantified (a). In an independent experiment, neomycin and PTX treated mice were  
 754 infected with HSV-2 and disease score monitored daily (b) and vaginal viral titers  
 755 measured (c). Vaginal dendritic cell populations were analyzed via flow cytometry, plots  
 756 are gated on CD19<sup>-</sup>,CD3<sup>-</sup>, Gr1<sup>-</sup>, MHCII<sup>+</sup> (d) and quantified in (e) (gating schema in  
 757 Supplementary Fig. 14). Depo-treated CD11cDTR mice were treated with 125ng  
 758 diphtheria toxin to deplete dendritic cells, treated intravaginally with 1mg neomycin for two  
 759 days (n=8) and vaginal gene expression measured via qPCR (f). Error bars represent  
 760 SEM. Significance was calculated using either a 2-way ANOVA for (b e) or using unpaired  
 761 t-tests, correcting for multiple comparisons. Exact p values for all comparisons are  
 762 reported in Table S2.

763

764 **Figure 6: Recruited XCR1<sup>+</sup> dendritic cells are required for ISG induction.**

765 Mice treated subcutaneously with Depo-Provera were inoculated intravaginally with  
 766 neomycin (1mg), PBS daily for 1 week or neomycin (1mg) and pertussis toxin (PTX)  
 767 (0.5µg) daily (n=3 mice per group). After 1 week of treatment, recruitment of XCR1<sup>+</sup>  
 768 vaginal DCs to the vaginal mucosa was measured. Plots are gated on CD19<sup>-</sup>, CD3<sup>-</sup>, Gr1<sup>-</sup>,  
 769 MHCII<sup>+</sup>CD11c<sup>+</sup> CD11b<sup>-</sup> live cells (a). Frequency of DCs quantified as a frequency of live  
 770 cells (b) (n=4-6 mice per group). Depo-treated XCR1DTR mice were treated with 500ng

771 diphtheria toxin to deplete XCR1+dendritic cells, treated intravaginally with 1mg neomycin  
772 for two days (n=2-5) and vaginal gene expression measured via qPCR (c). Exact p values  
773 for all comparisons are reported in Table S2.

Figure 1: Vaginal application of neomycin confers antiviral protection against HSV-2 in microbiota-independent manner

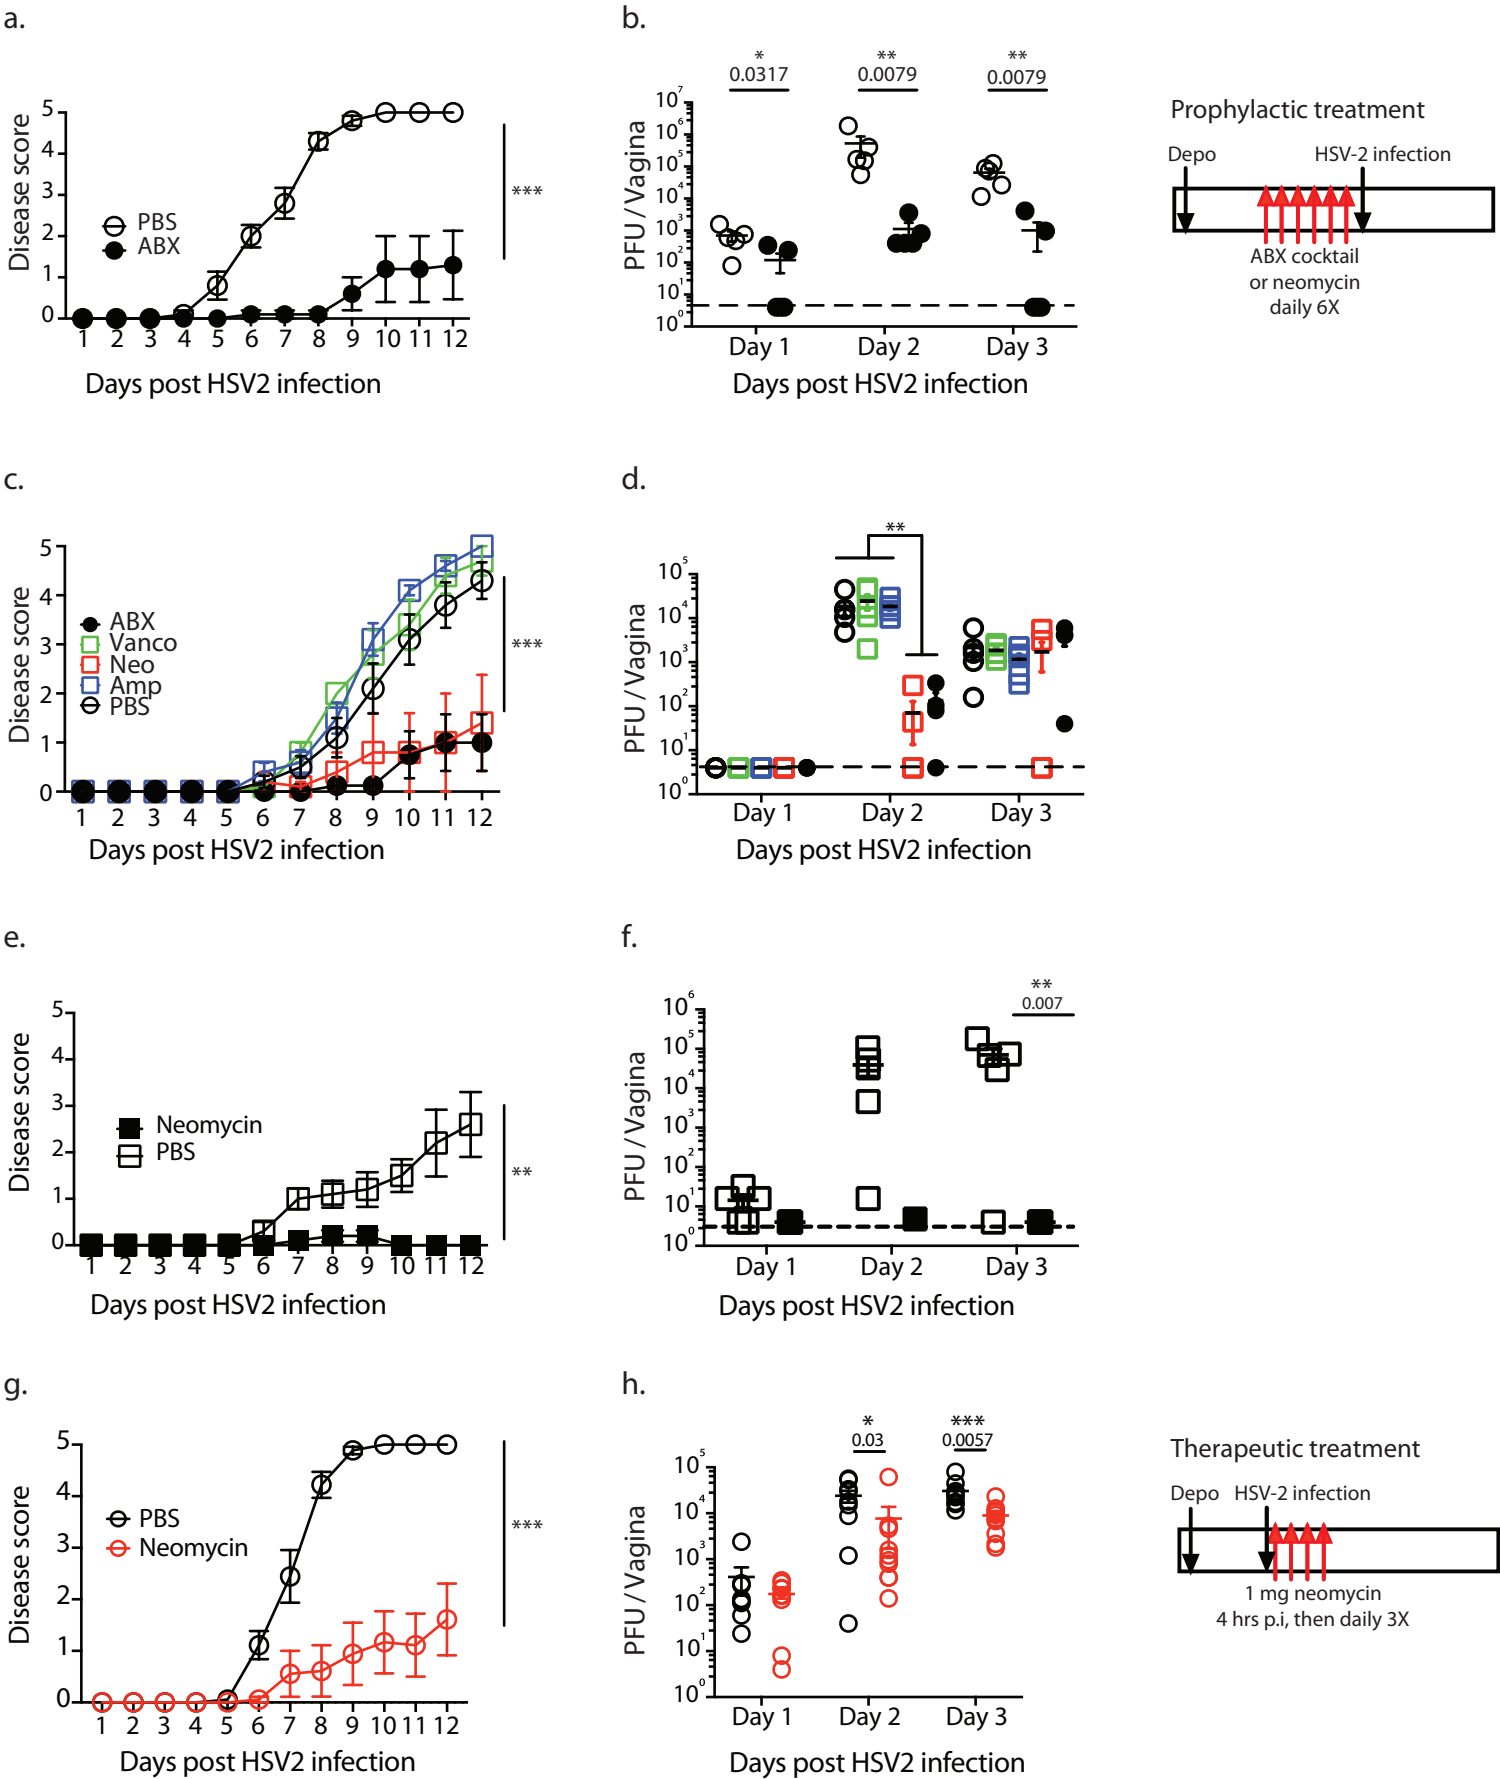

Figure 2: Vaginal application of most aminoglycosides induce interferon-stimulated genes, which is linked to antiviral protection.

a. 6 day aminoglycoside treatment

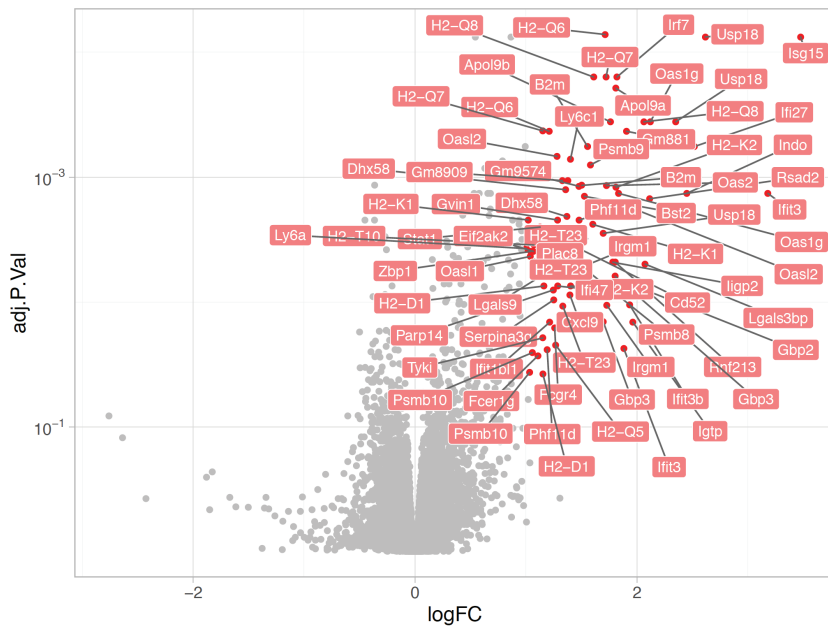

b.

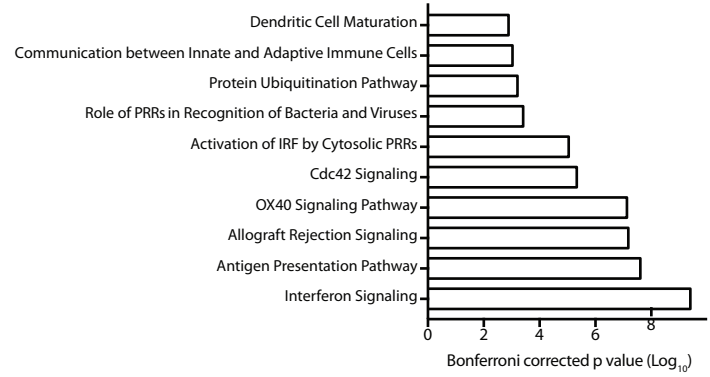

c. 6 day aminoglycoside treatment

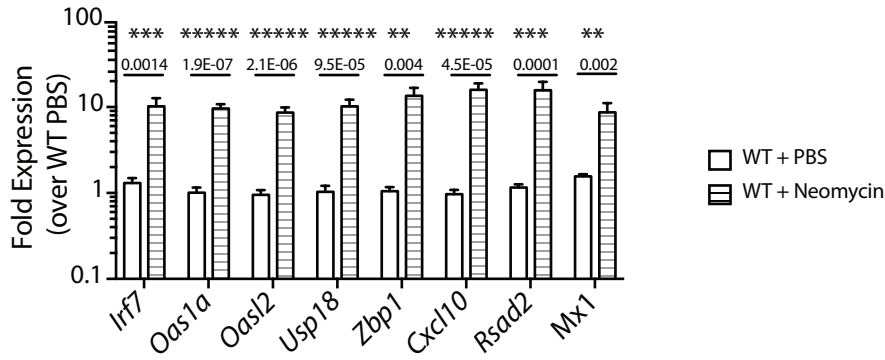

d. 2 day aminoglycoside treatment

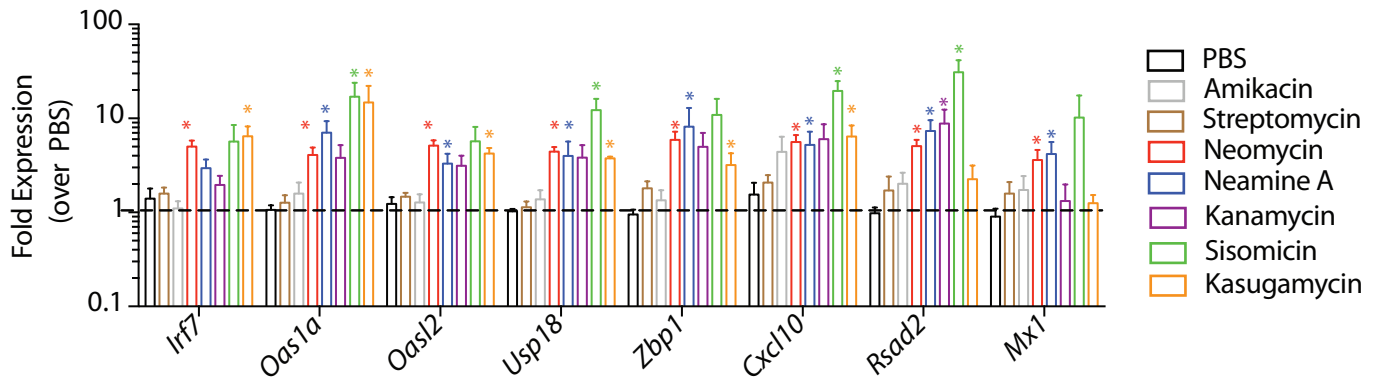

e. 6 day aminoglycoside treatment

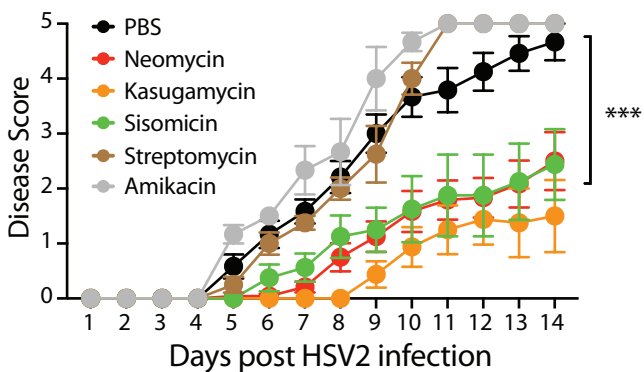

f. 6 day aminoglycoside treatment

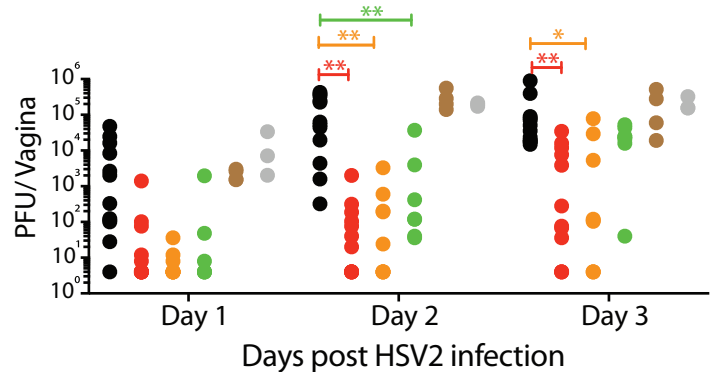

Figure 3: Aminoglycosides confer broad protection against both RNA and DNA viruses.

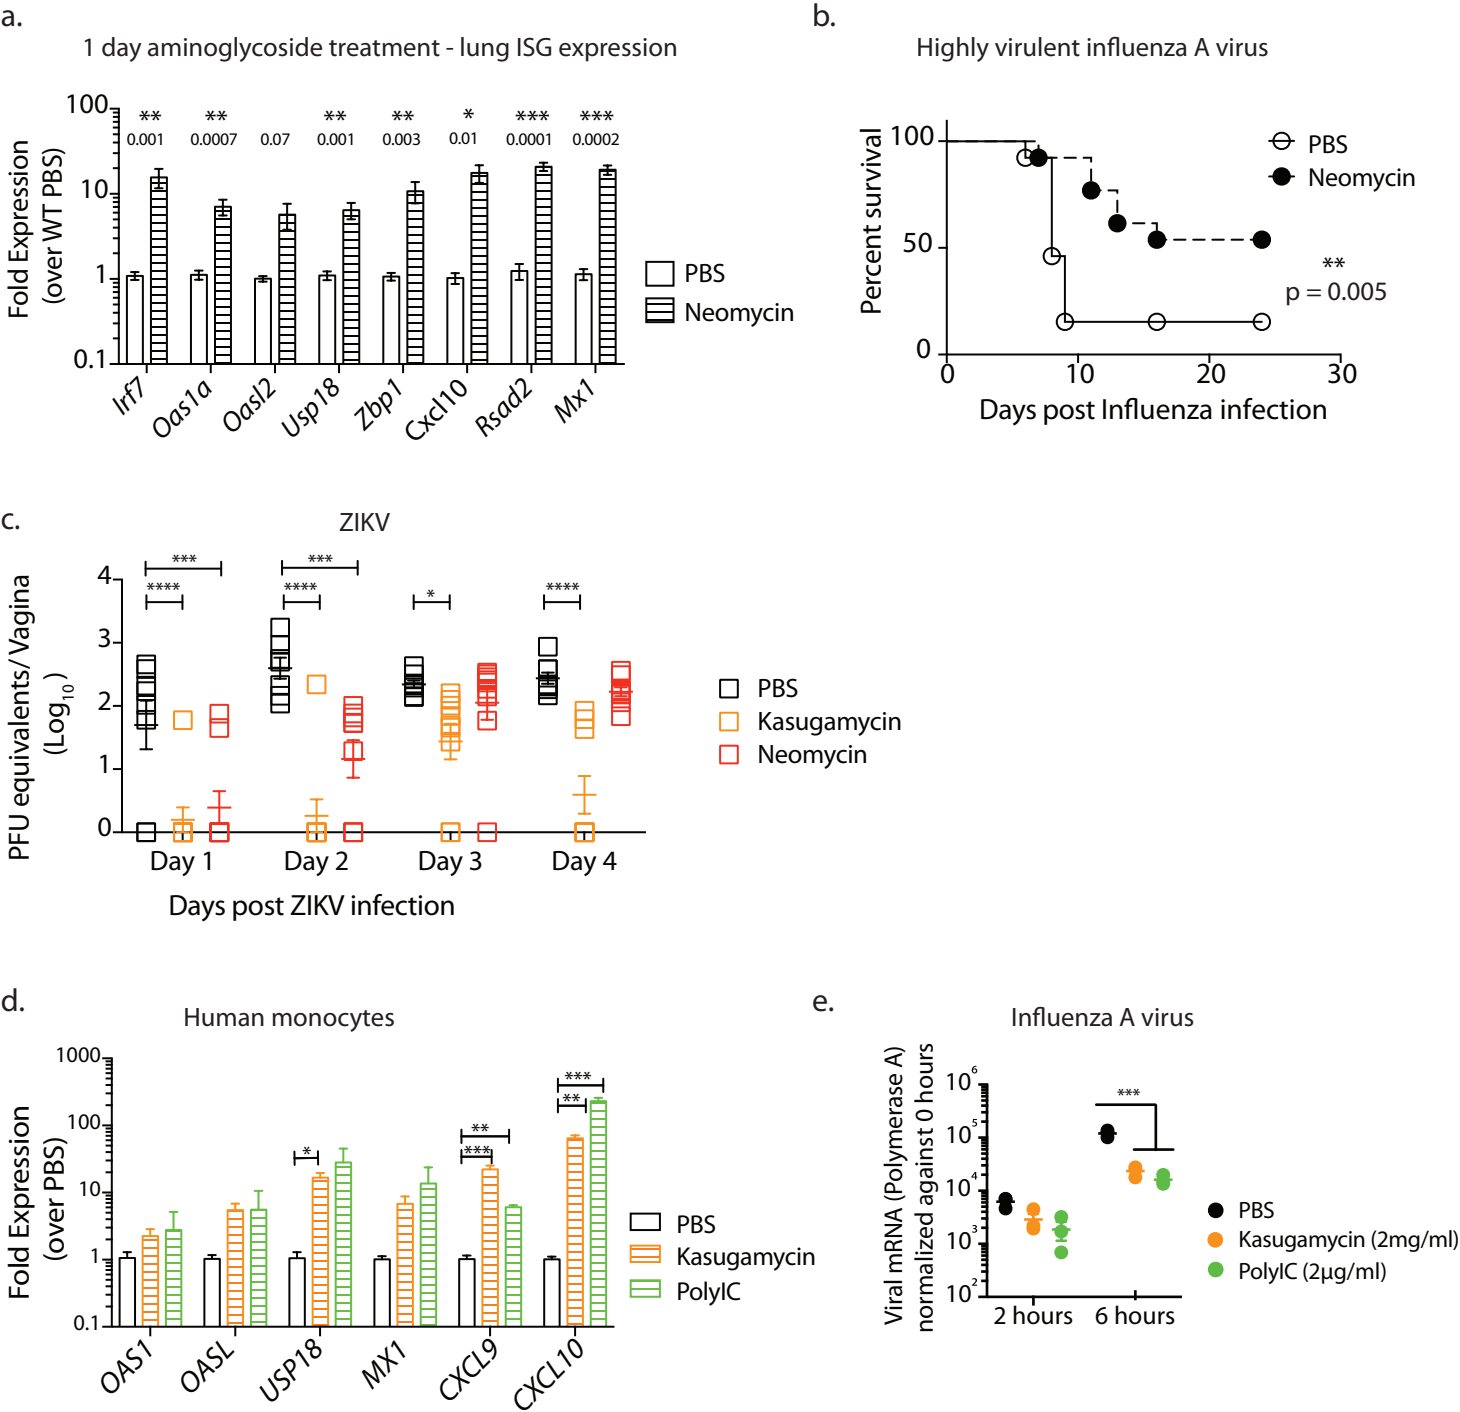

Figure 4: Aminoglycosides mediate antiviral immunity via the TLR3-TRIF-IRF3/7 signaling pathway.

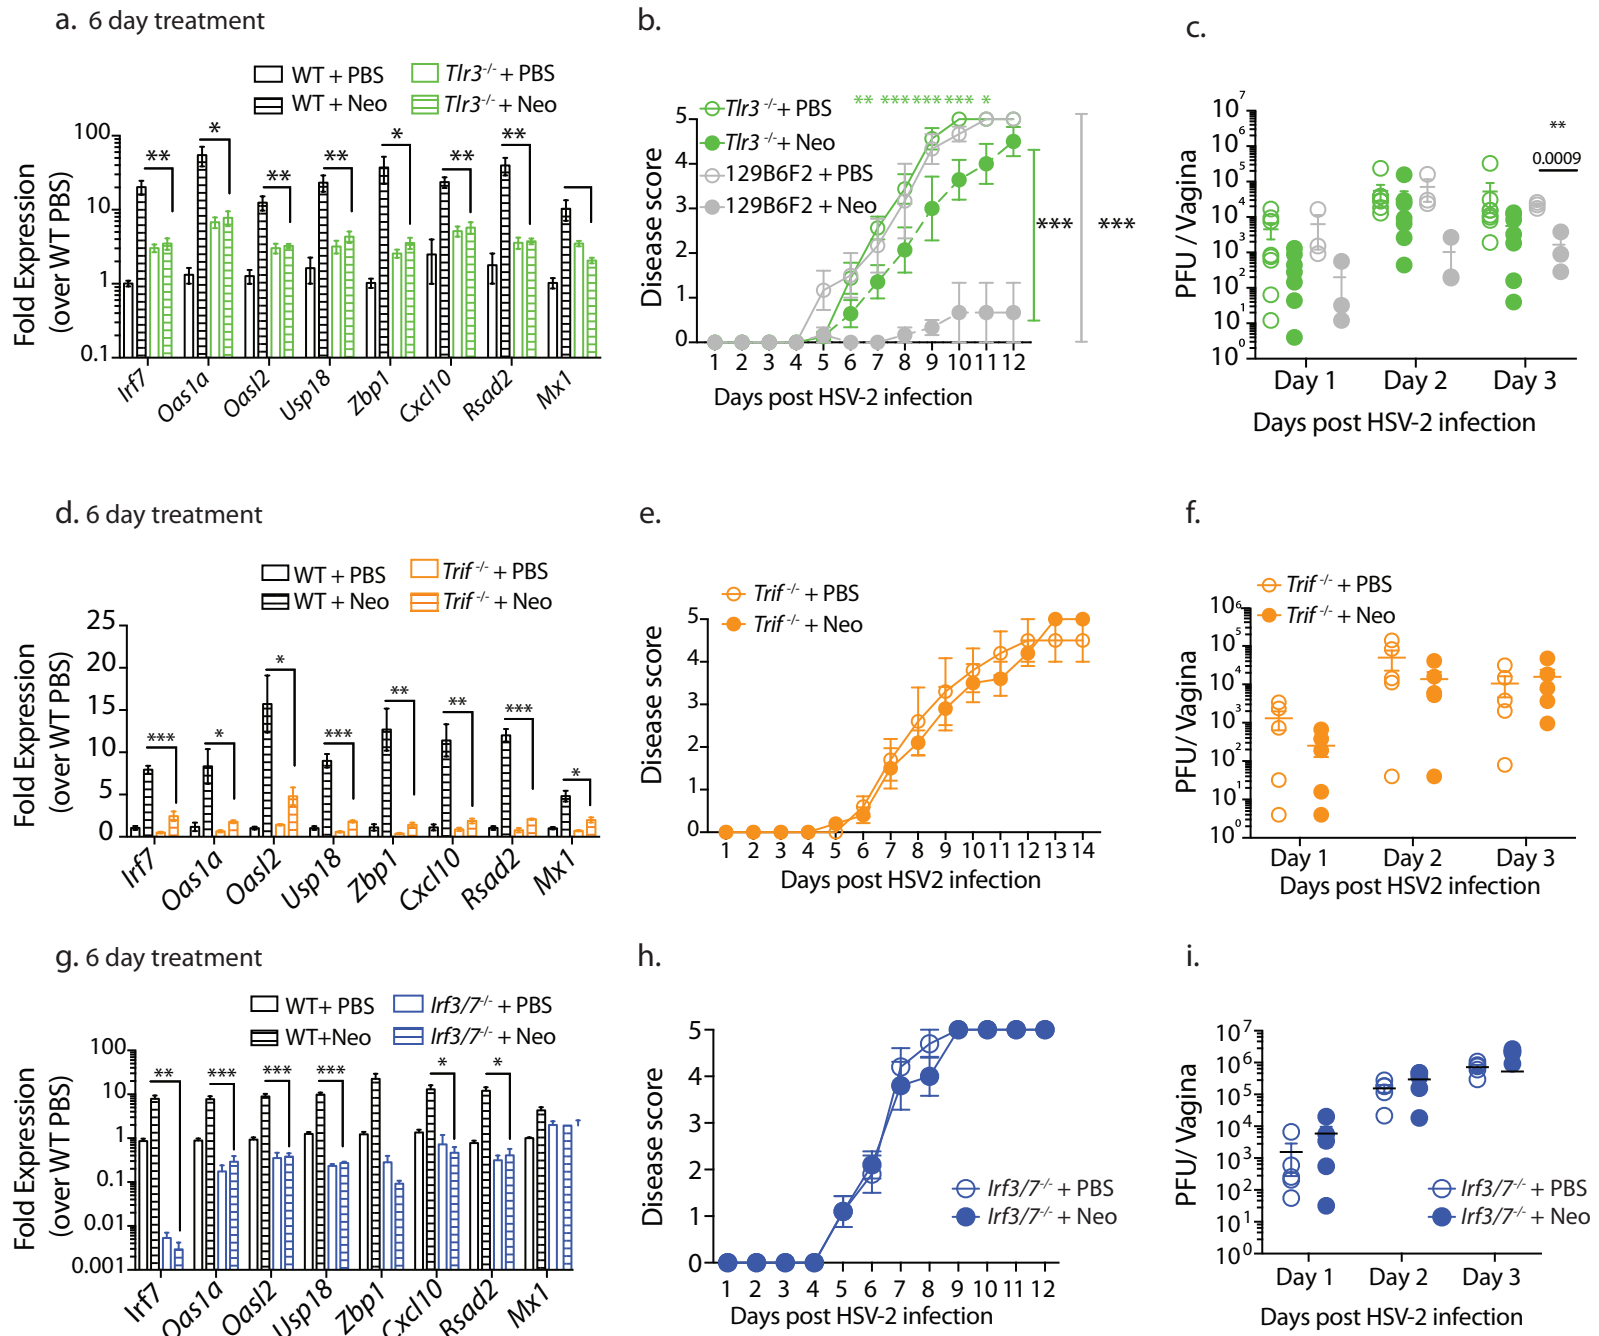

Figure 5: Recruited dendritic cells are required for ISG induction by neomycin.

a. Vaginal gene expression

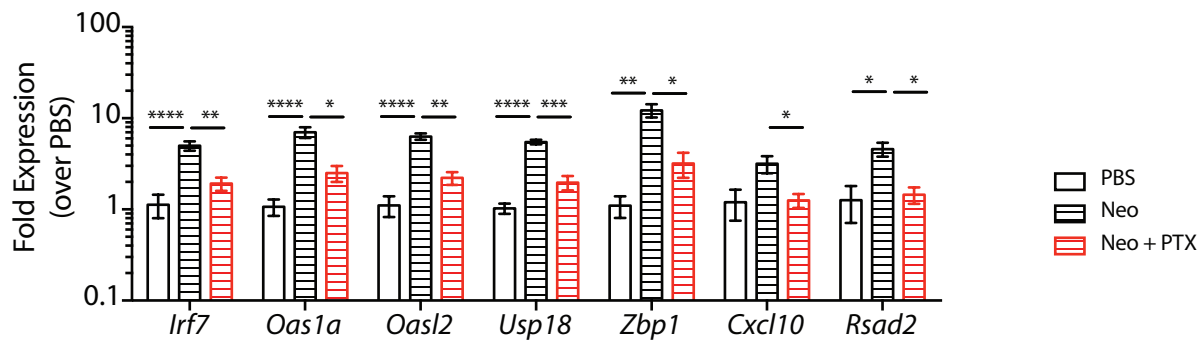

b. Disease scores

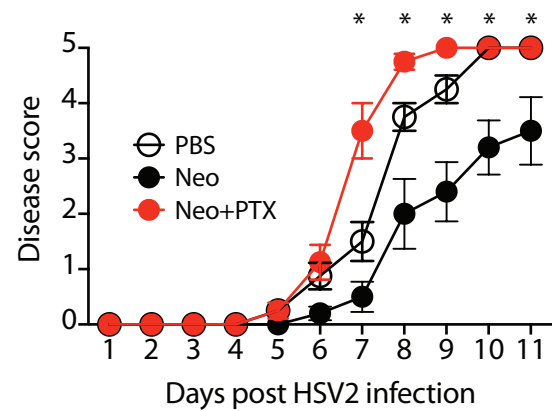

c. Viral Titers

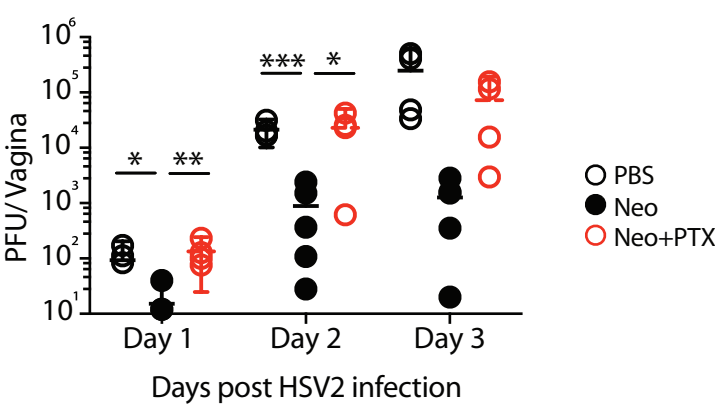

d. Gated on CD3<sup>-ve</sup> CD19<sup>-ve</sup> MHC-II<sup>+</sup>

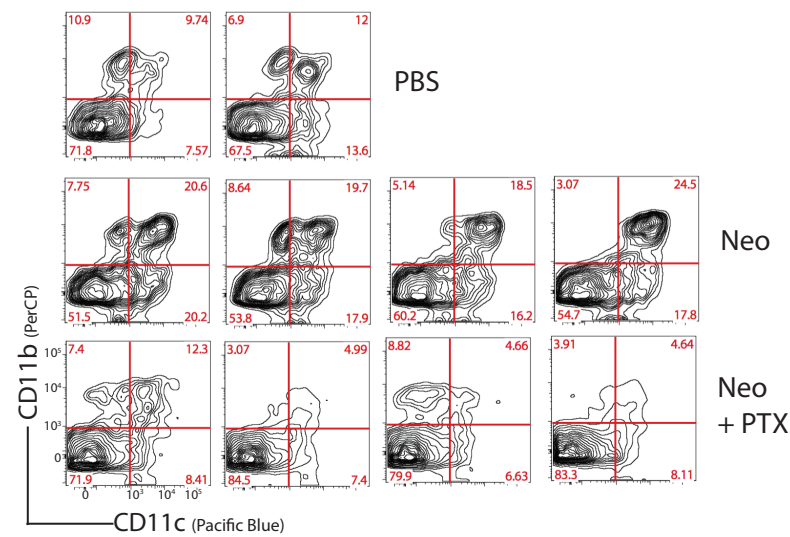

e.

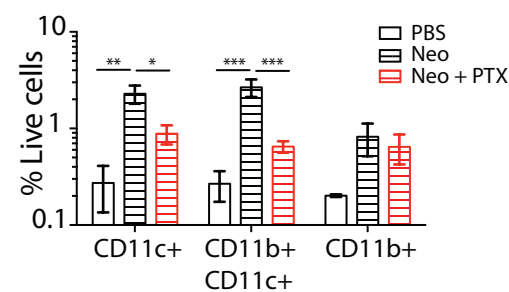

f. 2 day aminoglycoside treatment

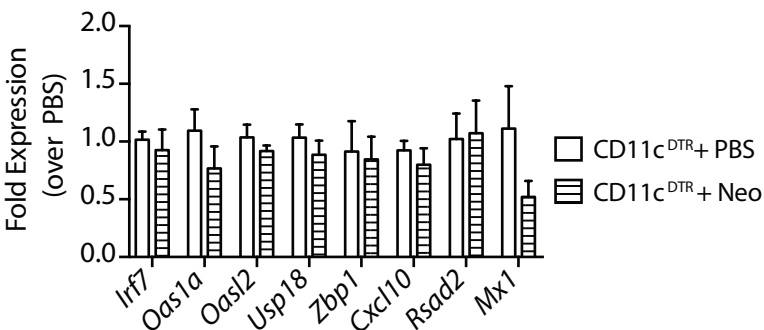

Figure 6: Recruited XCR1+ dendritic cells are required for ISG induction.

a. Gated on CD3-CD19-Gr1-NK1.1-MHC II+CD11b-ve CD11c+

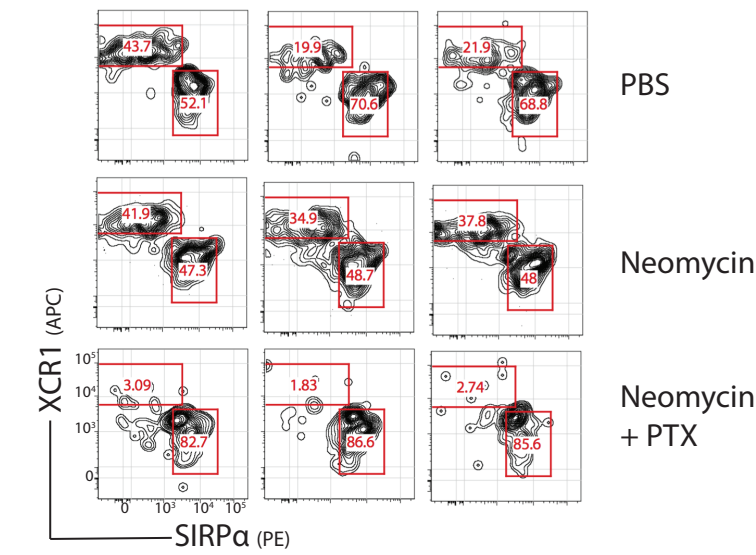

b.

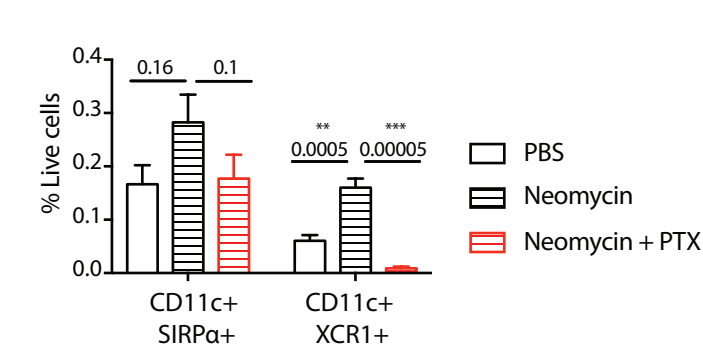

c. 6 day treatment

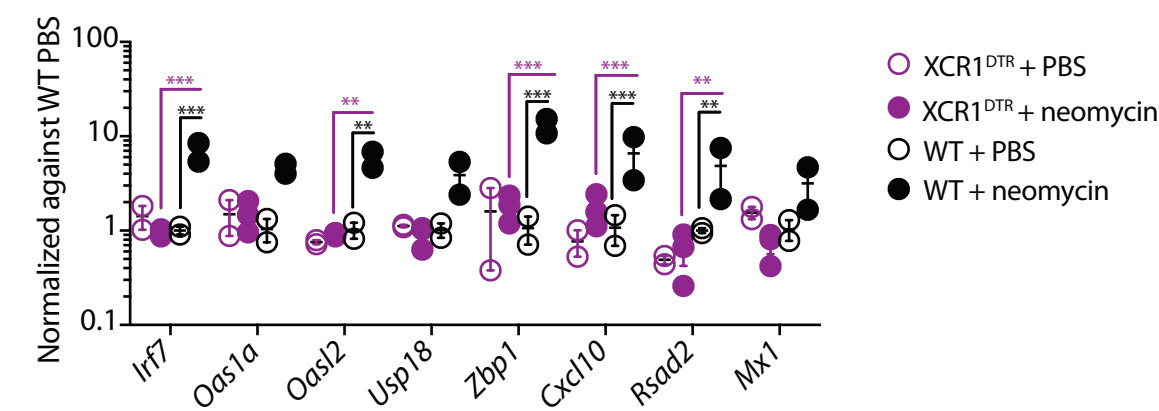



Supplementary Figure 1: While vaginal viral replication of antibiotic-treated mice eventually reaches levels of PBS-treated controls, viral replication in dorsal root ganglion remain suppressed.

a. ABX cocktail

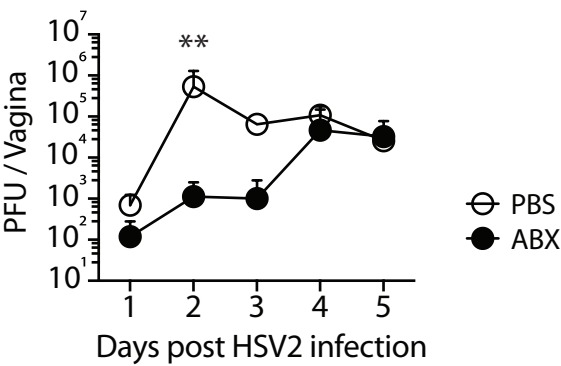

b. Single ABX treatment

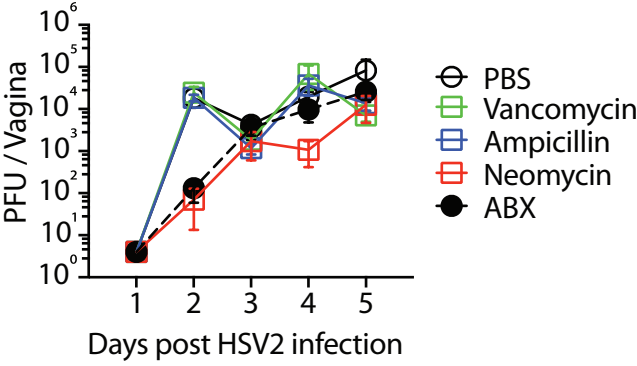

c. Therapeutic neomycin

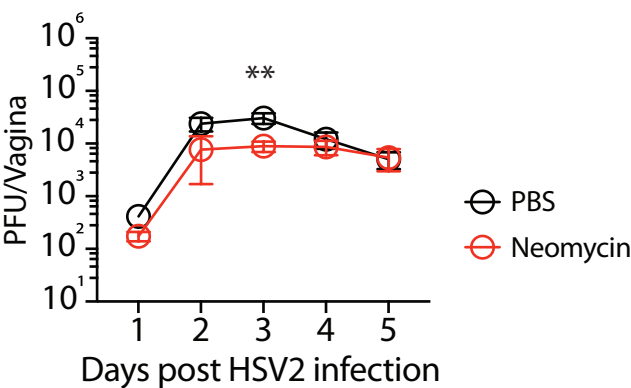

d. DRG viral titer (day 4)

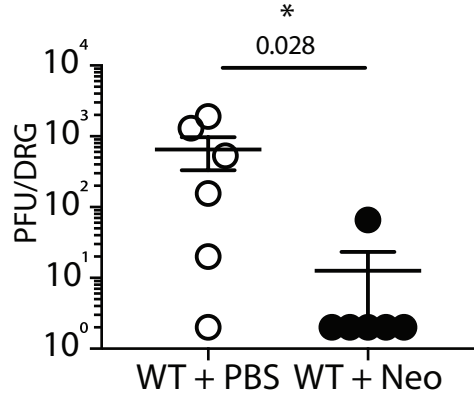

Mice treated subcutaneously with Depo-Provera were inoculated intravaginally with the indicated aminoglycoside (1mg) or PBS daily for 1 week. After 1 week of treatment, mice were infected with HSV-2. Viral titers in the vagina were measured at indicated time points (a-c). Viral titers in the dorsal root ganglion were measured 4 days post infection (d). Error bars represent SEM and significance was calculated using unpaired t-tests. Exact p values are reported in Table S2.

Supplementary Figure 2: Neomycin treatment increases ISG expression in germ-free mice.

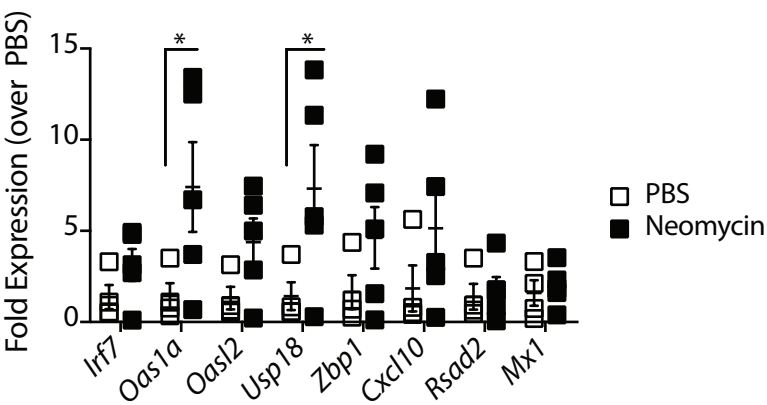

Depo-treated outbred germ-free swiss-webster mice (n=4-5) were treated with 1 mg neomycin or PBS daily for 6 days and vaginal gene expression analyzed. Error bars represent SEM and statistical significance was determined using a one-way ANOVA with \* representing p values < 0.05. Exact p values are reported in Table S2.

# Supplementary Figure 3: Kinetics of aminoglycoside-mediated ISG induction

## a. 1 day treatment

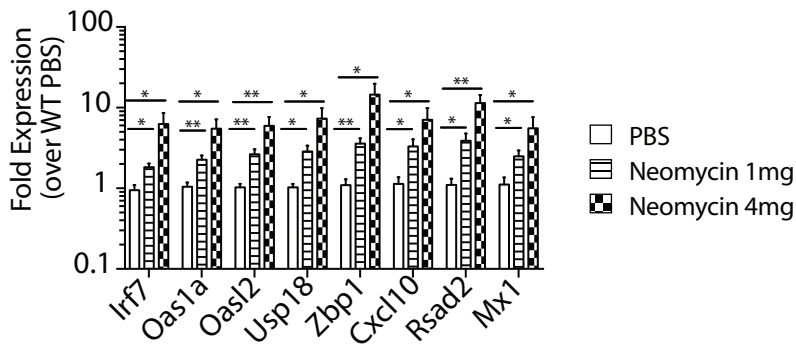

## b. Experiment schematic

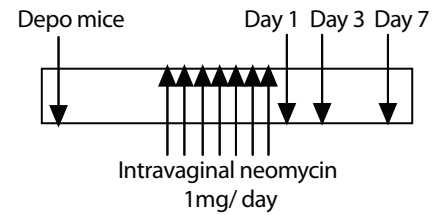

## c. Vaginal gene expression

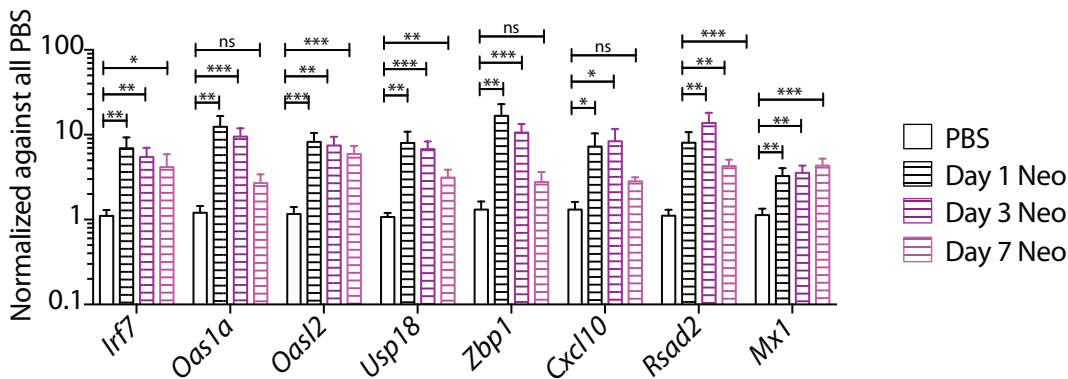

## d. 6 day treatment

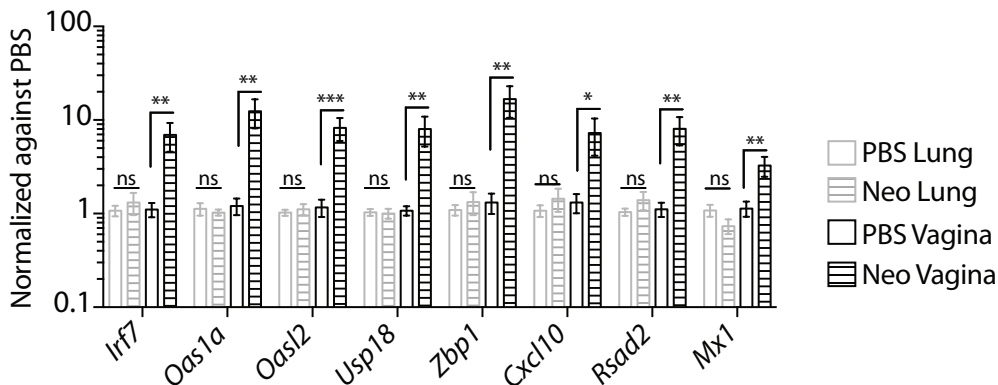

Mice treated subcutaneously with Depo-Provera were inoculated intravaginally with neomycin (1mg or 4.5 mgs) or PBS for 1 day (n = 3-5 mice per group). 24 hours later, vaginal gene expression was quantified. Depo-treated mice were inoculated intravaginally with neomycin (1mg/day) or PBS daily for 6 days. Mice were sacrificed 1,3 and 7 days after the last neomycin treatment as shown in (b) and vaginal gene expression analyzed at each time point (c). Depo-treated mice were inoculated with 1mg neomycin daily for 6 days and vaginal and lung ISG expression analyzed in mice 1 day post neomycin treatment (d). Error bars represent SEM and significance was calculated using unpaired t-tests, corrected for multiple comparison. Exact p values are reported in Table S2.

Supplementary Figure 4: ISG induction is not a common property of ribosomal antibiotics

a. Tetracycline 2 day treatment

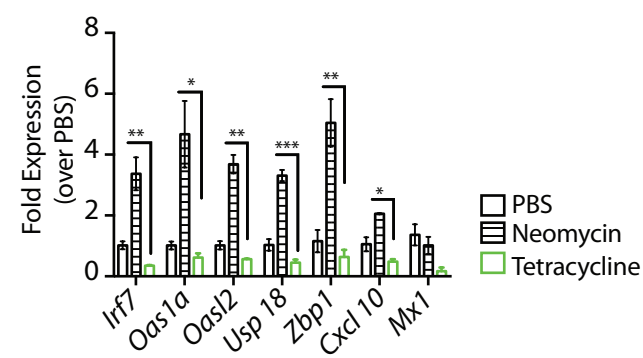

b. Chloramphenicol 2 day treatment

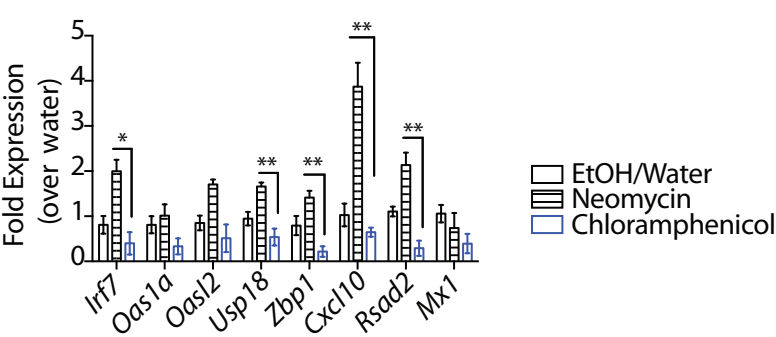

c. Mitochondrial DNA in neomycin-treated mice

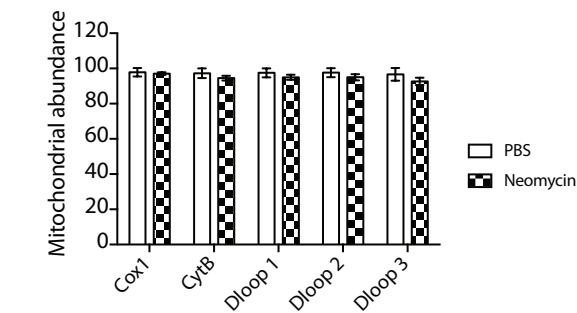

Mice were treated subcutaneously with Depo-Provera and five days after treatment were inoculated intravaginally with the indicated antibiotics (1mg/day) for 2 days (n=3 mice per group). Vaginal gene expression (a,b) and mitochondrial DNA abundance (c) was analyzed via qPCR . Significance was calculated using unpaired t-tests, correcting for multiple comparisons with \* indicating p values <0.05. Exact p values for all comparisons are reported in Table S2.

Supplementary Figure 5: The role of RNA and DNA sensors in aminoglycoside-mediated antiviral protection.

a. Vaginal gene expression

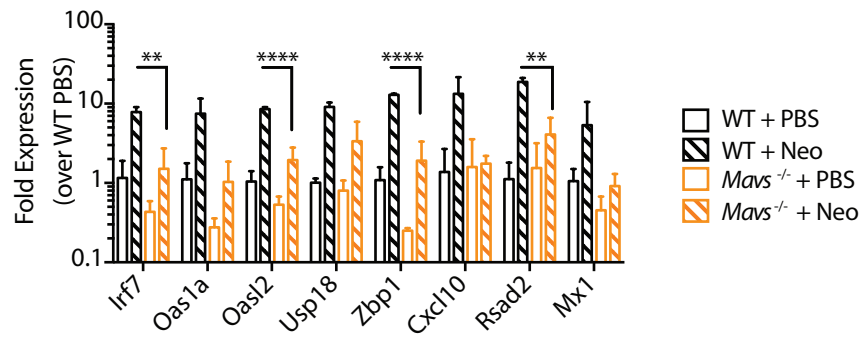

b. Disease score

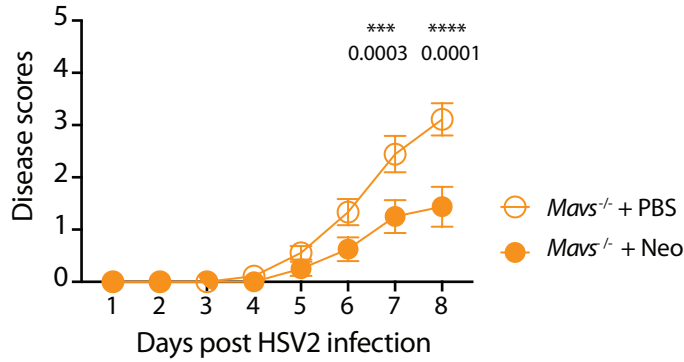

c. Viral titer

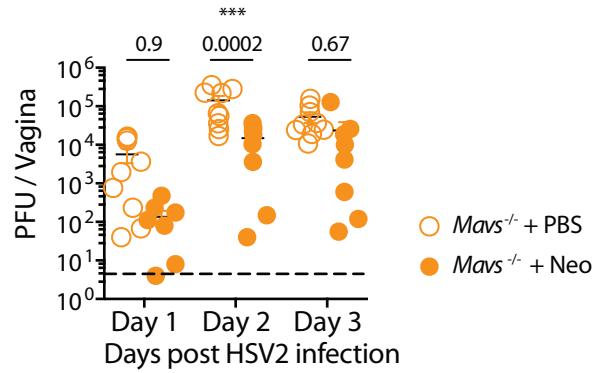

d. Vaginal gene expression

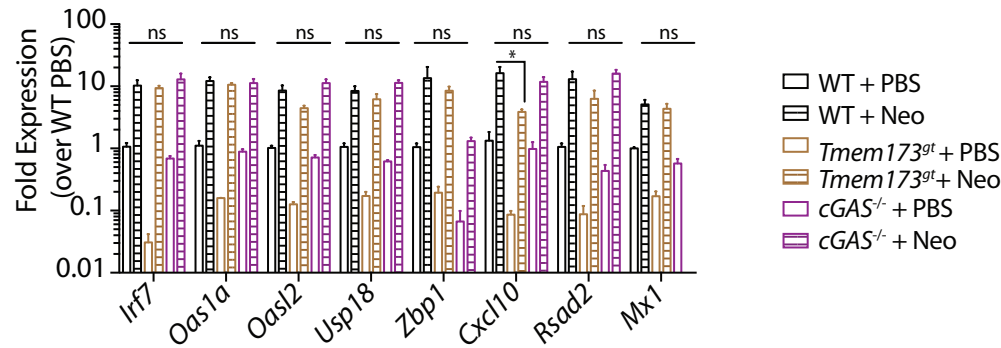

e. Disease score

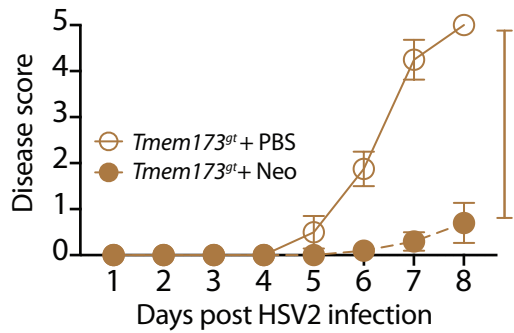

f. Viral titer

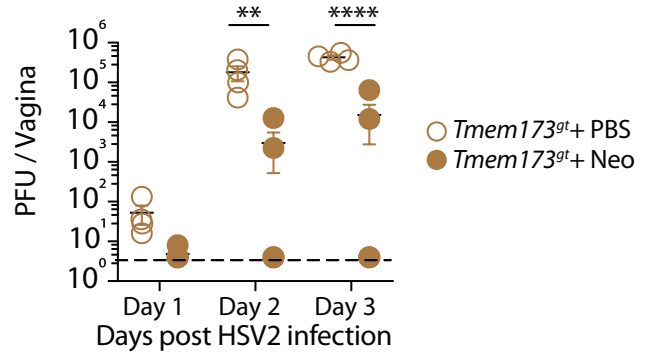

RNA sensor (*Mavs*<sup>-/-</sup>), DNA sensor (*Tmem173*<sup>gt</sup>, *cGAS*<sup>-/-</sup>) knockout mice and accompanying WT controls were treated subcutaneously with Depo-Provera and treated intravaginally with neomycin (1mg/day) or PBS for 6 days and vaginal gene expression measured via qPCR (a,d). Neomycin-treated *Mavs*<sup>-/-</sup> and *Tmem173*<sup>gt</sup> mice were also infected with HSV-2, disease score monitored daily (b,e) and vaginal viral titers measured (c,f). Error bars represent SEM and significance was calculated using either unpaired t-tests (a,d) or 2-way ANOVA (b,c,e,f) correcting for multiple comparisons. Exact p values for all comparisons are reported in Table S2.

Supplementary Figure 6: Aminoglycoside-mediated antiviral activity does not require TLR7 signaling.

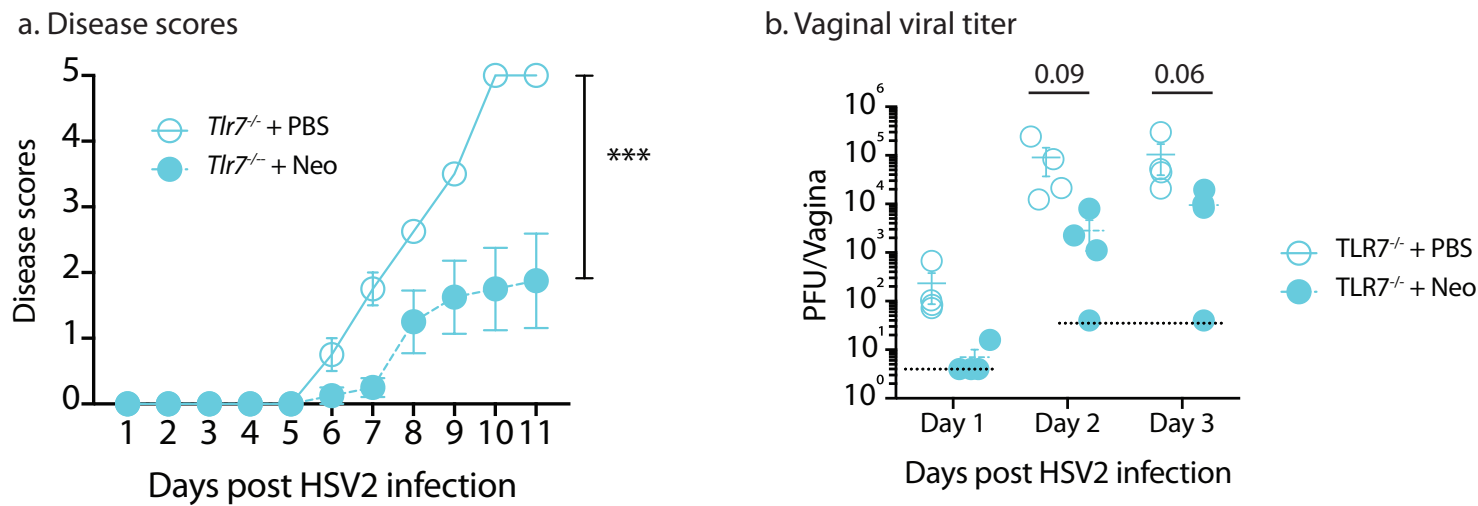

Depo-treated *Tlr7*<sup>-/-</sup> mice were treated intravaginally with neomycin (1mg/day) for 6 days and then infected with HSV-2 and disease scores monitored (a) and vaginal viral titer measured (b). Error bars represent SEM and statistical significance was calculated using 2-way ANOVA (a,b). Specific p values are reported in Table S2.

# Supplementary Figure 7: Role of IFNAR signaling in aminoglycoside-mediated antiviral protection

## a. Vaginal ISG expression 6 day treatment

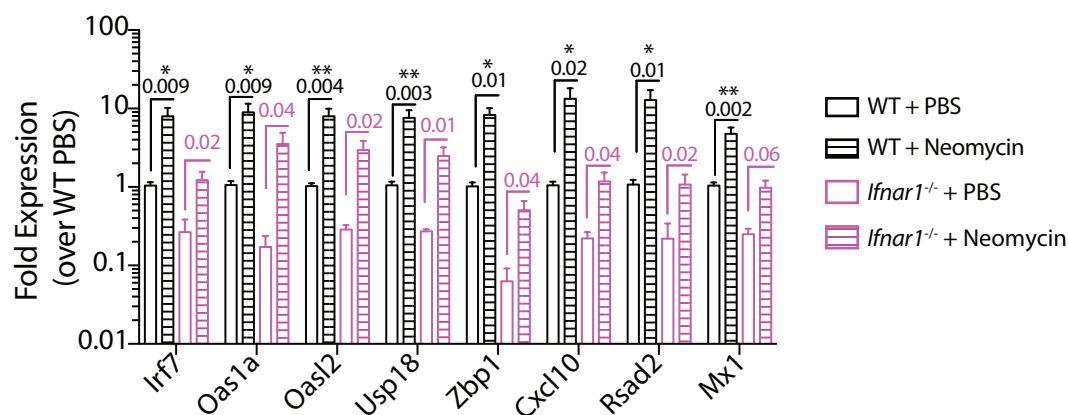

## b.

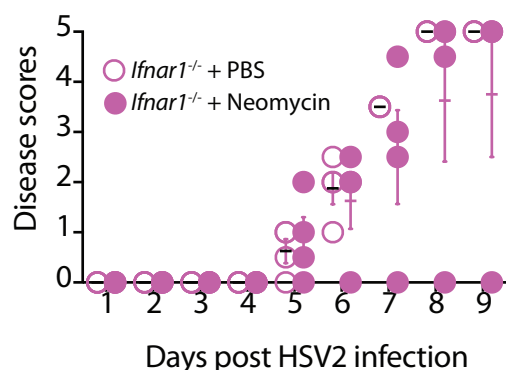

## c.

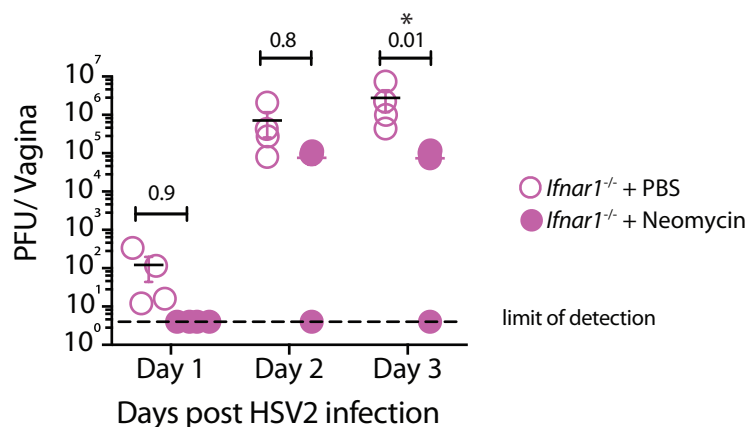

Type I IFN receptor knockout mice (*Ifnar1*<sup>-/-</sup>) and accompanying WT controls were treated subcutaneously with Depo-Provera and treated intravaginally with neomycin (1mg) or PBS daily for 6 days and vaginal gene expression measured via qPCR (a). In an independent experiment neomycin-treated *Ifnar1*<sup>-/-</sup> mice and PBS-treated controls were also infected with HSV-2, disease score monitored daily (b) and vaginal viral titers measured (c). Error bars represent SEM and significance was calculated using either unpaired t-tests (a) or 2-way ANOVA (b,c) correcting for multiple comparisons. Exact p values for all comparisons are reported in Table S2.



Supplementary Figure 8: Neomycin treatment results in increased ISG expression in vaginal dendritic cells.

6 day treatment

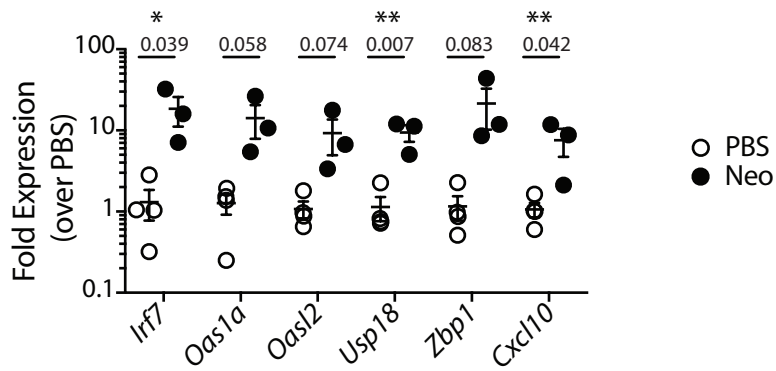

Mice (n= 3-4) were treated subcutaneously with Depo-Provera and five days after treatment were inoculated intravaginally with neomycin (1mg) or equivalent volume of PBS daily for six days. Vaginal tissue was harvested, CD11c+ve cells isolated and gene expression analyzed. Significance was calculated using unpaired t-tests, correcting for multiple comparisons with \* indicating p values <0.05.

# Supplementary Figure 9: Neomycin treatment increases recruitment of IFN $\beta$ + cDCs.

## a. IFN $\beta$ (YFP+) populations

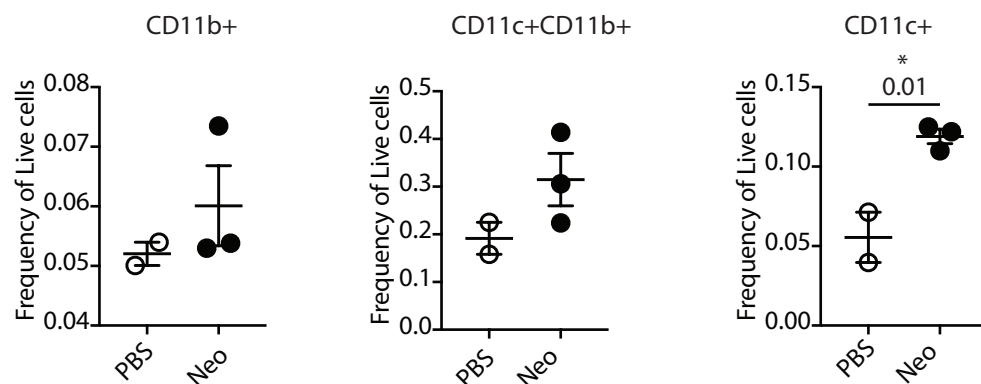

## b. Vaginal pDCs - (gated on CD3-CD19-Gr1-MHC II+CD11c+CD11b- cells)

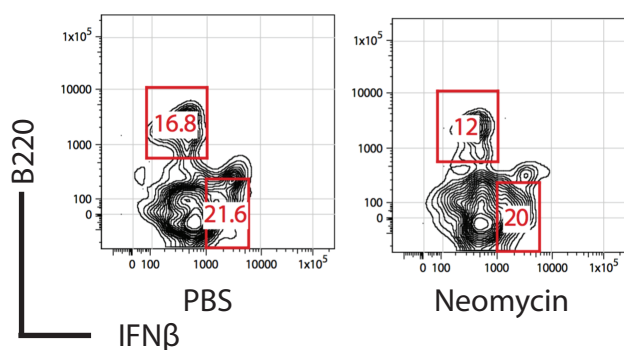

## c. Quantification of b.

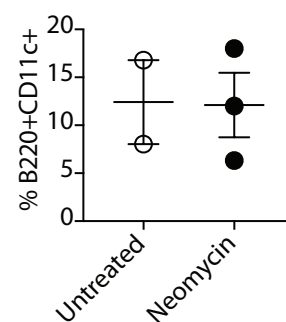

Depo-treated IFN $\beta$ <sup>YFP</sup> reporter mice were treated with 1mg neomycin or PBS daily for 6 days and vaginal dendritic cell populations analyzed. IFN $\beta$ + populations were gated on CD3-CD19-NK1.1-Gr1-MHC II+ cells and quantified as a frequency of total live cells (a). Plasmacytoid DCs were gated as B220+CD11c+ cells and quantified (b,c). Error bars represent SEM and significance was calculated using an unpaired t-test.

Supplementary Figure 10: TLR3 expression across immune cell types obtained from the ImmGen database.

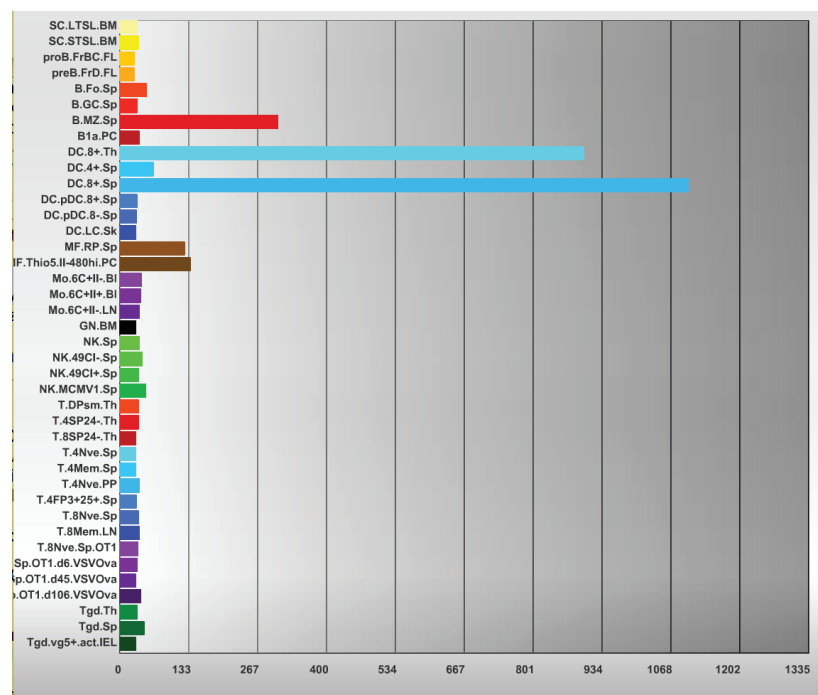

The ImmGen data base (<https://www.immgen.org/>) was queried on 9/21/2017 for expression of TLR3 across all available dendritic cell gene expression datasets.

Supplementary Figure 11: Intravaginal aminoglycoside treatment induces minimal inflammation and *in-vitro* aminoglycoside treatment induces minimal cell death.

a 6 day treatment

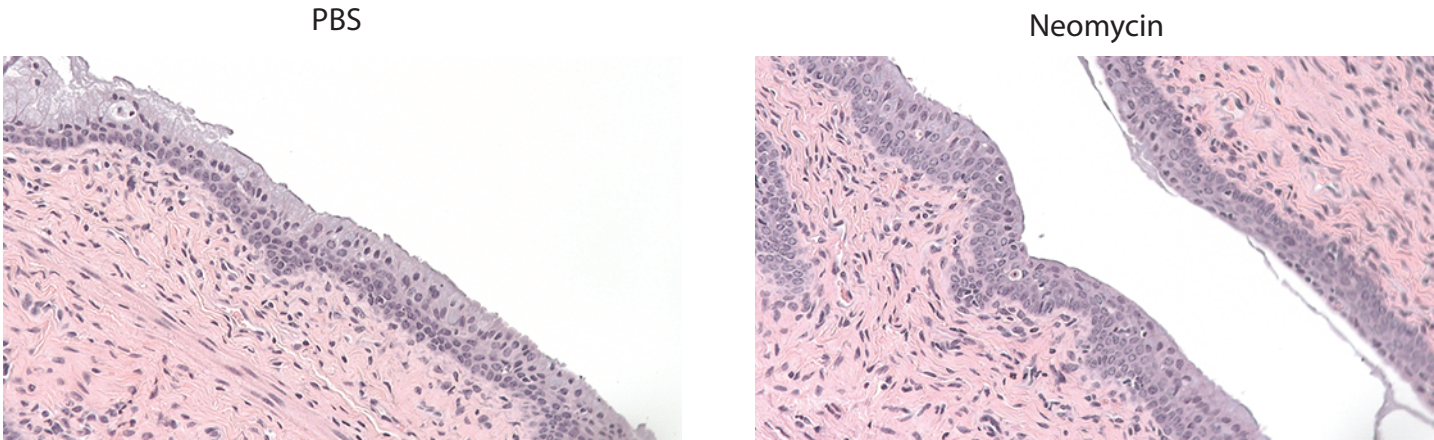

b.

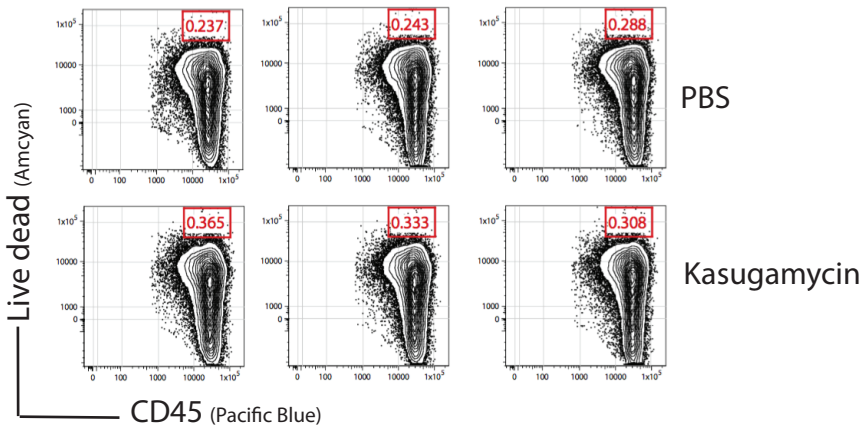

c. quantification of b

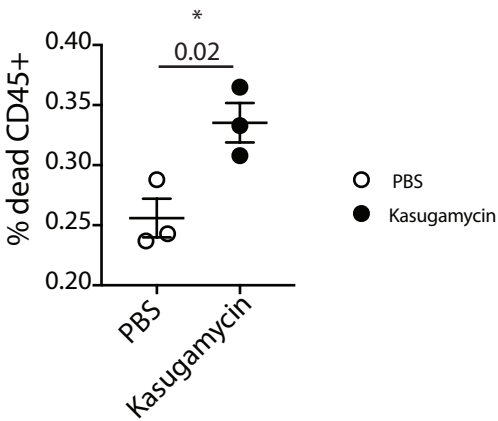

d. Dead cells as a frequency of total cells

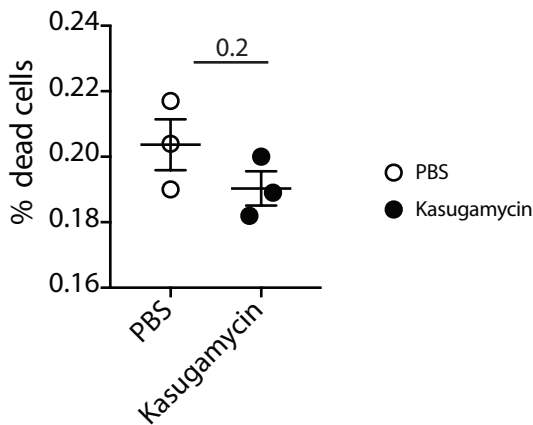

e.

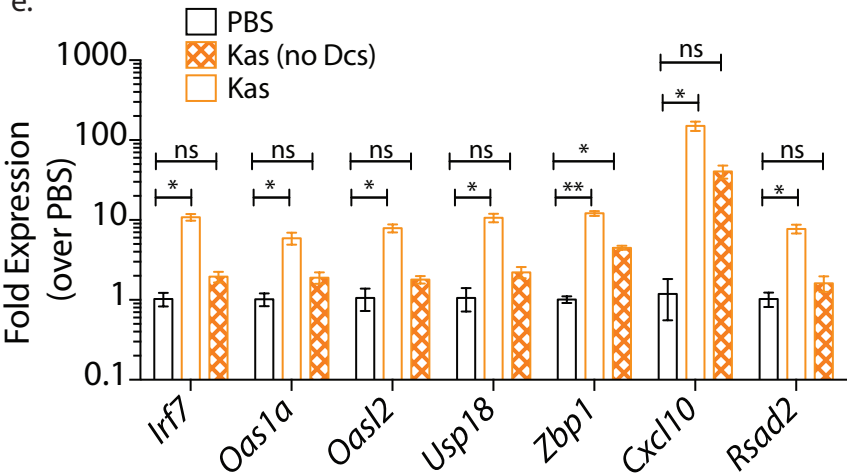

Mice treated subcutaneously with Depo-Provera were inoculated intravaginally with PBS or neomycin (1mg) for one week. Vaginal tissue from neomycin-treated and PBS control mice was fixed, embedded and stained with hematoxylin and eosin. Images are magnified 200X (a). Splenocytes were treated with 2mg/ml kasugamycin for 6 hours and dead cells were quantified using fixable live/dead stain as a frequency of total leukocytes (c) or total cells (d). In an independent experiment kasugamycin-treated splenocytes were depleted of DCs and ISG expression quantified (e). Error bars represent SEM and exact p values are reported in Table S2.

Supplementary Figure 12: Kasugamycin-treated splenocytes induce ISG expression in DCs in a TLR3 dependent manner.

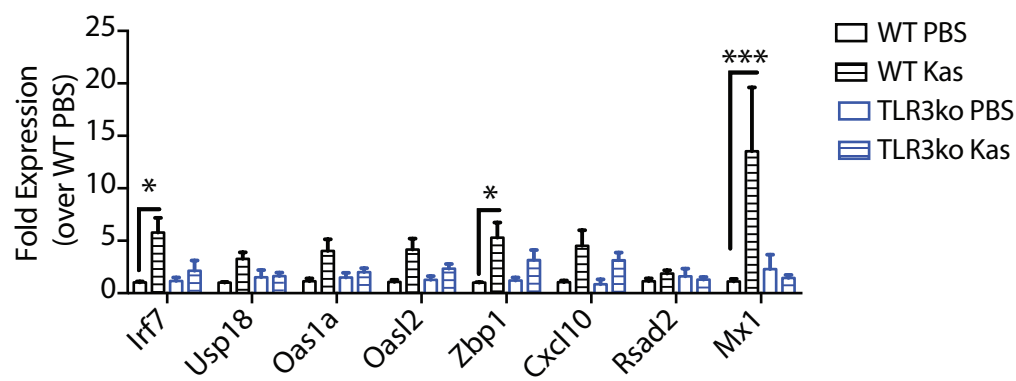

Splenocytes were treated with 2mg/ml kasugamycin for 12 hours, washed thoroughly, stained with cell trace violet and incubated with DCs isolated from WT or *TLR3*<sup>ko</sup> splenocytes. After 6 hours of incubation, DCs (cell trace violet dim and negative cells) were sorted, RNA extracted and ISG expression quantified. Error bars represent SEM and specific p values are detailed in Table S2.

Supplementary Figure 13: Kasugamycin can synergize with PolyI:C to amplify ISG expression.

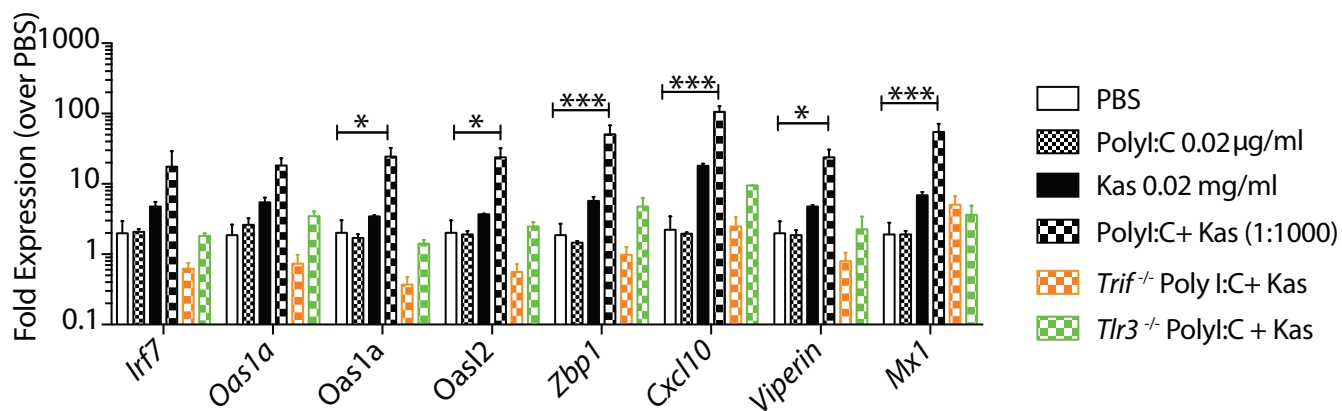

Splenocytes from WT, *Trif*<sup>-/-</sup> or *Tlr3*<sup>-/-</sup> mice were treated with 0.02  $\mu$ g/ml Poly I:C, 0.02mg/ml kasugamycin or the two together for 6 hours and ISG expression quantified. Error bars represent SEM and significance was calculated using a 2-way ANOVA. Specific p values are reported in Table S2.

Supplementary Figure 14: Flow cytometry gating schema.

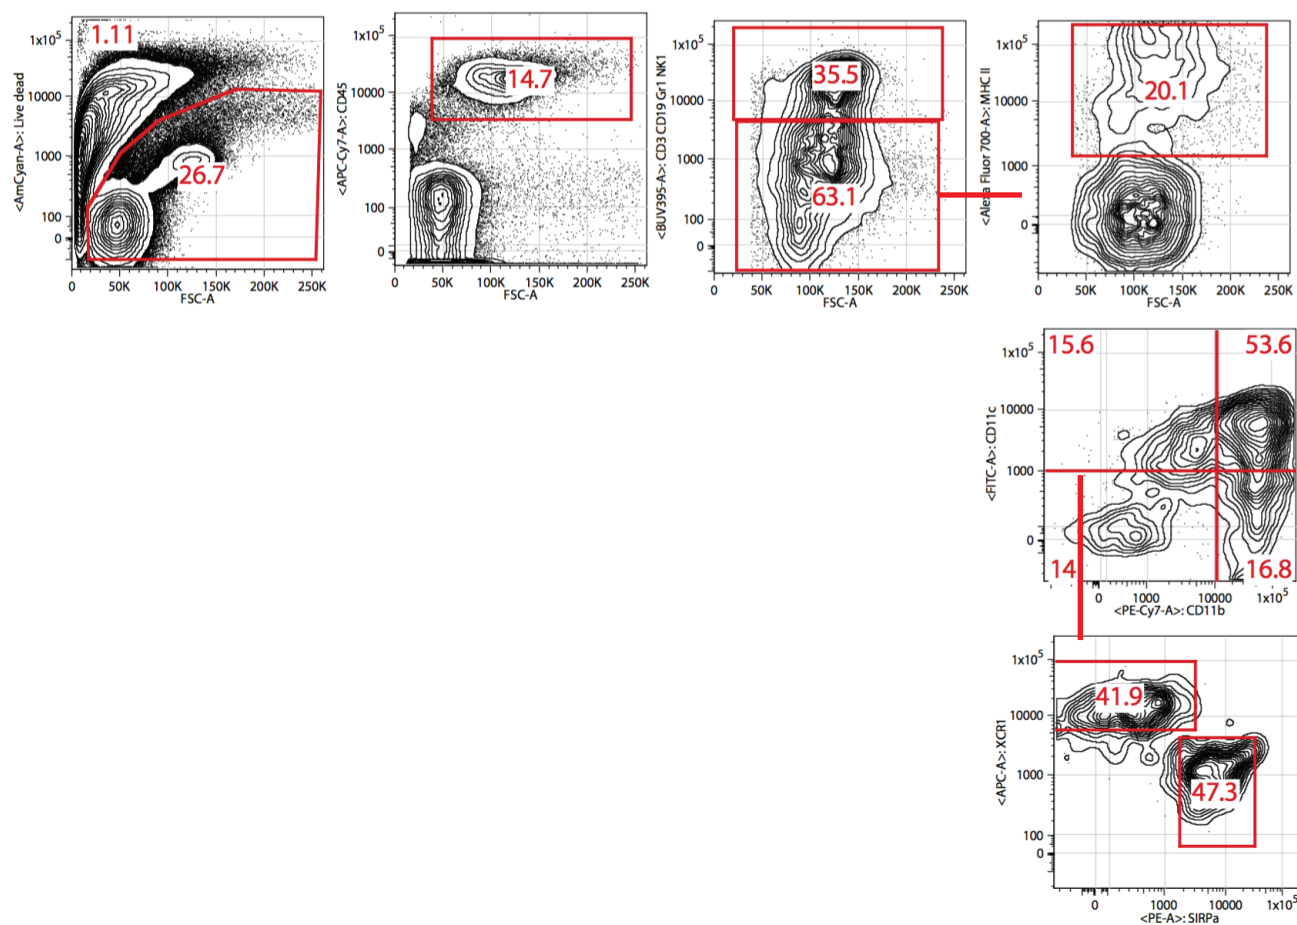

Vaginal single cell suspensions were gated on live cells, leukocytes (CD45+). MHC-II+ve cells were gated on CD3/CD19/G1-ve populations. CD11b-Cd11c+ cells were gated on MHC-II+ve cells and were further gated on XCR1+ SIRPα-ve cells.
